# Supplementary material for: Development of highly selective and sensitive probes for hydrogen peroxideElectronic supplementary information (ESI) available: general methods. See http://www.rsc.org/suppdata/cc/b3/b309393j/
Source: Royal Society of Chemistry journal article supplement (doi:10.1039/b309393j), 2003-01-01

# Electronic Supplementary Information

Development of highly sensitive and selective probes for hydrogen peroxide

Lee-Chiang Lo* and Chi-Yuan Chu

Department of Chemistry, National Taiwan University

Taipei 106, TAIWAN

**General Methods.** Melting points are uncorrected. IR spectra were taken with Nicolet Magna-IR 550 Series II. 1H and 13C NMR spectra were recorded at 400 and 100 MHz in CDCl3, respectively. High-resolution mass spectra were recorded on a JEOL-102A mass spectrometer. Analytical TLC (silica gel, 60F-54, Merck) and spots were visualized under UV light and/or phosphomolybdic acid-ethanol. Flash column chromatography was performed with silica gel 60 (70-230 mesh, Merck). The preparation of probes **1a** and **1b** is shown in Scheme 1.

**Scheme 1** Synthesis of probes **1a** and **1b**.

**2-[4-(*tert*-Butyl-dimethyl-silanyloxymethyl)-phenyl]-4,5-dimethyl-[1,3,2]dioxaborolane (3):** To a solution of boronic acid **2** (2.12 g, 7.97 mmol) in 30 mL of anhydrous ether was added 10 g of anhydrous magnesium sulfate and 0.79 mL of 2,3-butanediol. The reaction mixture was stirred at rt for 14 h. It was then filtered, concentrated, and subjected to silica gel column chromatography eluted with hexane/EtOAc (95/5) to give the desired ester **3** in 99% yield (2.03 g). R*f* = 0.23 (hexane/EtOAc = 95/5). 1H NMR (400 MHz, CDCl3):  7.75 (d, *J* = 7.8 Hz, 2 H, aromatic), 7.32 (d, *J* = 7.8 Hz, 2 H, aromatic), 4.74 (s, 2 H, benzylic), 4.174.13 (m, 2 H), 1.37 (d, *J* = 6.0 Hz, 6 H), 0.92 (s, 9 H, *tert*-Bu), 0.07 (s, 6 H, Me). 13C NMR (100 MHz, CDCl3): 144.8 (C), 134.7 (CH), 125.3 (CH), 80.5 (CH), 64.9 (CH2), 25.9 (CH3), 20.9 (CH3), 18.4 (C), -5.3 (CH3). IR (neat): 2959, 2933, 2910, 2891, 2861, 1616, 1413, 1403, 1374, 1342, 1113, 1094, 839, 777 cm-1. HRMS calcd for C17H28BO3Si (M-1)+ 319.1901, found 319.1900.

**2-(4-Hydroxymethyl-phenyl)-4,5-dimethyl-[1,3,2]dioxaborolane (4):** To a solution of ester **3** (2.02 g, 6.33 mmol) in 25 mL of THF, was added 12.7 mL of Bu4NF (1 M in THF). It was stirred at rt for 12 h. The reaction mixture was then concentrated to a syrup, and dissolved in 150 mL of EtOAc. It was washed with 30 mL of water (×2) and saturated NaCl solution. The EtOAc layer was dried over anhydrous Na2SO4. It was filtered, concentrated, and subjected to silica gel column chromatography eluted with hexane/EtOAc (6/4) to give the desired alcohol **4** in 88% yield (1.15 g). R*f* = 0.41 (hexane/EtOAc = 6/4). 1H NMR (400 MHz, CDCl3):  7.79 (d, *J* = 8.0 Hz, 2 H, aromatic), 7.32 (d, *J* = 8.0 Hz, 2 H, aromatic), 4.71 (d, *J* = 5.9 Hz, 2 H, benzylic), 4.18-4.14 (m, 2 H), 1.68 (t, *J* = 5.9 Hz, 1 H), 1.37 (d, *J* = 6.0 Hz, 6 H). 13C NMR (100 MHz, CDCl3): 144.0 (C), 135.1 (CH), 126.1 (CH), 80.6 (CH), 65.3 (CH2), 20.9 (CH3). IR (neat): 3420, 2975, 2909, 1618, 1366, 1318, 1223, 1095, 1034, 652 cm-1. HRMS calcd for C11H15BO3 (M)+ 206.1114, found 206.1116.

**Preparation of probes 1a and 1b:** Triphosgene (360 mg, 1.21 mmol) was added to a solution of alcohol **4** (500 mg, 2.43 mmol) and triethylamine (506 L, 3.64 mmol) in 30 mL of THF at 0oC. The reaction mixture was gradually allowed to return to rt and stirred for 2 h. The white precipitate formed was filtered off and washed with THF. The filtrate was pooled and concentrated to give crude **5**. 1H NMR (400 MHz, CDCl3):  7.82 (d, *J* = 8.0 Hz, 2 H, aromatic), 7.37 (d, *J* = 8.0 Hz, 2 H, aromatic), 5.30 (s, 2 H, benzylic), 4.19-4.15 (m, 2 H), 1.38 (d, *J* = 6.07 Hz, 6 H). 13C NMR (100 MHz, CDCl3): 150.7 (C), 136.2 (C), 135.2 (C), 127.9 (CH), 80.7 (CH), 73.2 (CH2), 20.9 (CH3). IR (neat): 2974, 2929, 1779, 1410, 1377, 1362, 1317, 1227, 1145, 1095 cm-1. Crude **5** was used directly for the preparation of probes **1a** and **1b**. *p*-Nitroaniline (206 mg, 1.46 mmol) was added to a solution of the crude **5** in 30 mL of THF. The reaction mixture was stirred at rt for 24 h. THF was removed and the residual syrup was dissolved in 100 mL of EtOAc. It was washed with 30 mL of water (×2) and saturated NaCl solution. The EtOAc layer was dried over anhydrous Na2SO4. It was filtered, concentrated, and subjected to silica gel column chromatography eluted with CH2Cl2/EtOAc (6/4) to give probe **1a** in 84% yield (459 mg). R*f* = 0.45 (CHCl3/EtOAc = 6/4). 1H NMR (400 MHz, CDCl3):  8.18 (d, *J* = 9.0 Hz, 2 H, aromatic), 7.81 (d, *J* = 7.7 Hz, 2 H, aromatic), 7.53 (d, *J* = 9.0 Hz, 2 H, aromatic), 7.38 (d, *J* = 7.7 Hz, 2 H, aromatic), 7.03 (s, 1 H, NH), 5.23 (s, 2 H, benzylic), 4.18-4.15 (m, 2 H), 1.38 (d, *J* = 5.7 Hz, 6 H). 13C NMR (100 MHz, CDCl3): 152.5 (C), 143.7 (C), 143.1 (C), 138.3 (C), 135.1 (CH), 127.5 (CH), 125.2 (CH), 117.8 (CH), 80.7 (CH), 67.5 (CH2), 20.9 (CH3). IR (neat): 1740, 1720, 1615, 1550, 1504, 1412, 1333, 1220, 1096, 1050, 847 cm-1. HRMS calcd for C18H20BN2O6 (M+1)+ 371.1414, found 371.1427. Probe **1b** was similarly prepared. Yield 64%. R*f* = 0.38 (hexane/EtOAc = 4/6). 1H NMR (400 MHz, CDCl3):  7.81 (d, *J* = 8.1 Hz, 2 H, aromatic), 7.50 (d, *J* = 8.7 Hz, 1 H, aromatic), 7.42-7.35 (m, 4 H, aromatic), 6.92 (s, 1 H, NH), 6.17 (s, 1 H, aromatic), 5.23 (s, 2 H, benzylic), 4.18-4.15 (m, 2 H), 2.38 (s, 3 H), 1.38 (d, *J* = 6.0 Hz, 6 H). 13C NMR (100 MHz, CDCl3): 161.1 (C), 154.4 (C), 152.7 (C), 152.2 (C), 141.3 (C), 138.6 (C), 135.1 (CH), 127.4 (CH), 125.4 (CH), 115.6 (C), 114.4 (CH), 113.2 (CH), 106.0 (CH), 80.7 (CH), 67.3 (CH2), 20.9 (CH3), 18.6 (CH3). IR (neat): 3277, 1730, 1694, 1621, 1591, 1409, 1363, 1252, 1096 cm-1. HRMS calcd for C22H23BNO6 (M+1)+ 408.1618, found 408.1620.

**Reactions of probe 1a with various amounts of hydrogen peroxide:** A 96-well plate was used for the reactions, and they were monitored and recorded with a microplate reader at 405 nm. Each well contains 210 L of NaHCO3 (200 mM), 60 L of probe **1a** (1.0 mM in DMF), and 30 L of hydrogen peroxide solutions (100~500 M). The total volume was 300 L. In the background reaction, 30 L of water was used in place of the hydrogen peroxide solution. The reaction mixture was kept at 25oC. For each H2O2 concentration, absorbance values between 8090 min were averaged and background subtracted. The plot of A405 *vs* hydrogen peroxide concentration was shown in Figure 1.

**Determination of glucose using probe 1a:** Each well contains 210 L of glucose solutions (14.3~71.5 M in 200 mM NaHCO3) and 30 L of glucose oxidase solution (30 U/mL in 50 mM Tris buffer, pH 7.0). They were first incubated for 30 min. 60 L of probe **1a** (1.0 mM in DMF) was then added. The total volume was 300 L. The absorbance (A405) for each well was recorded and treated as describe above. The plot of A405 *vs* glucose concentration was shown in Figure 2.

**Reactions of probe 1b with various amounts of hydrogen peroxide:** A 96-well plate was used for the reactions, and they were monitored and recorded with a fluorescence microplate reader (ex 355 nm, em 460 nm). Each well contains 190 L of NaHCO3 (221 mM), 60 L of probe **1b** (1.0 mM in DMF), and 50 L of hydrogen peroxide solutions (0.6~30 M). The total volume was 300 L. In the background reaction, 50 L of water was used in place of the hydrogen peroxide solution. The reaction mixture was kept at 26oC. For each H2O2 concentration, fluorescence intensities between 5060 min were averaged and background subtracted. The plot of the fluorescence response *vs* hydrogen peroxide concentration was shown in Figure 3.


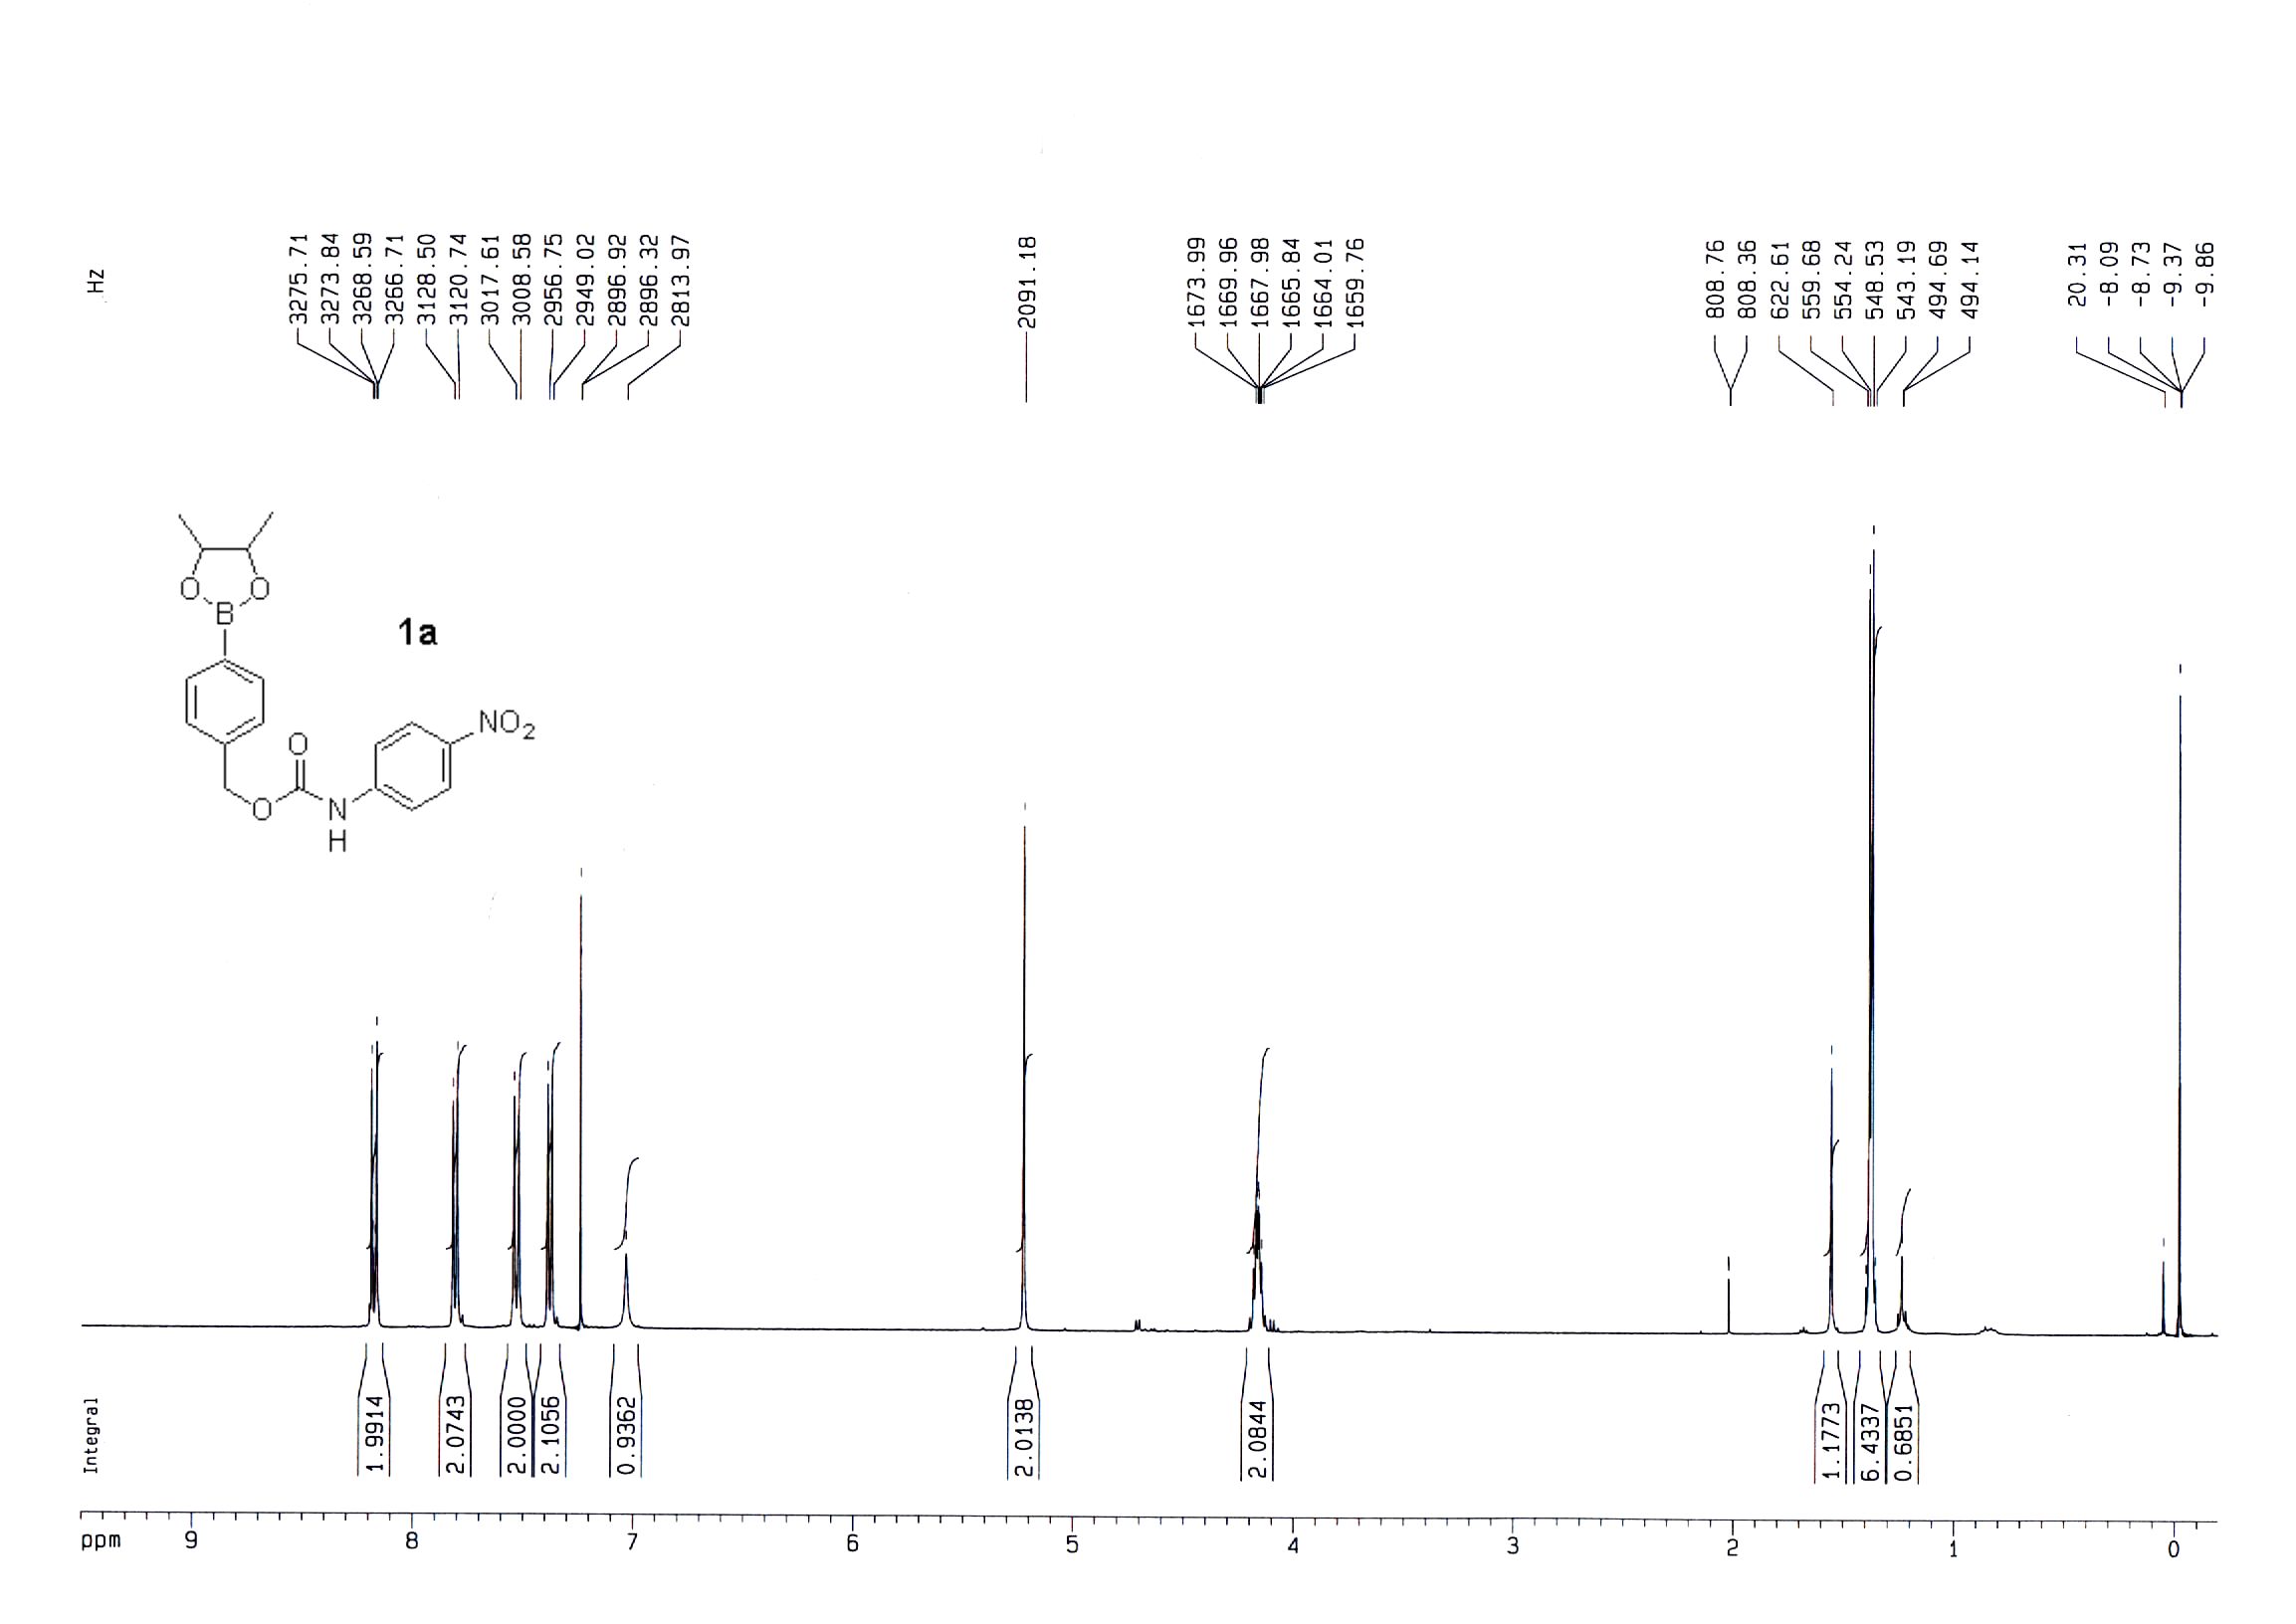


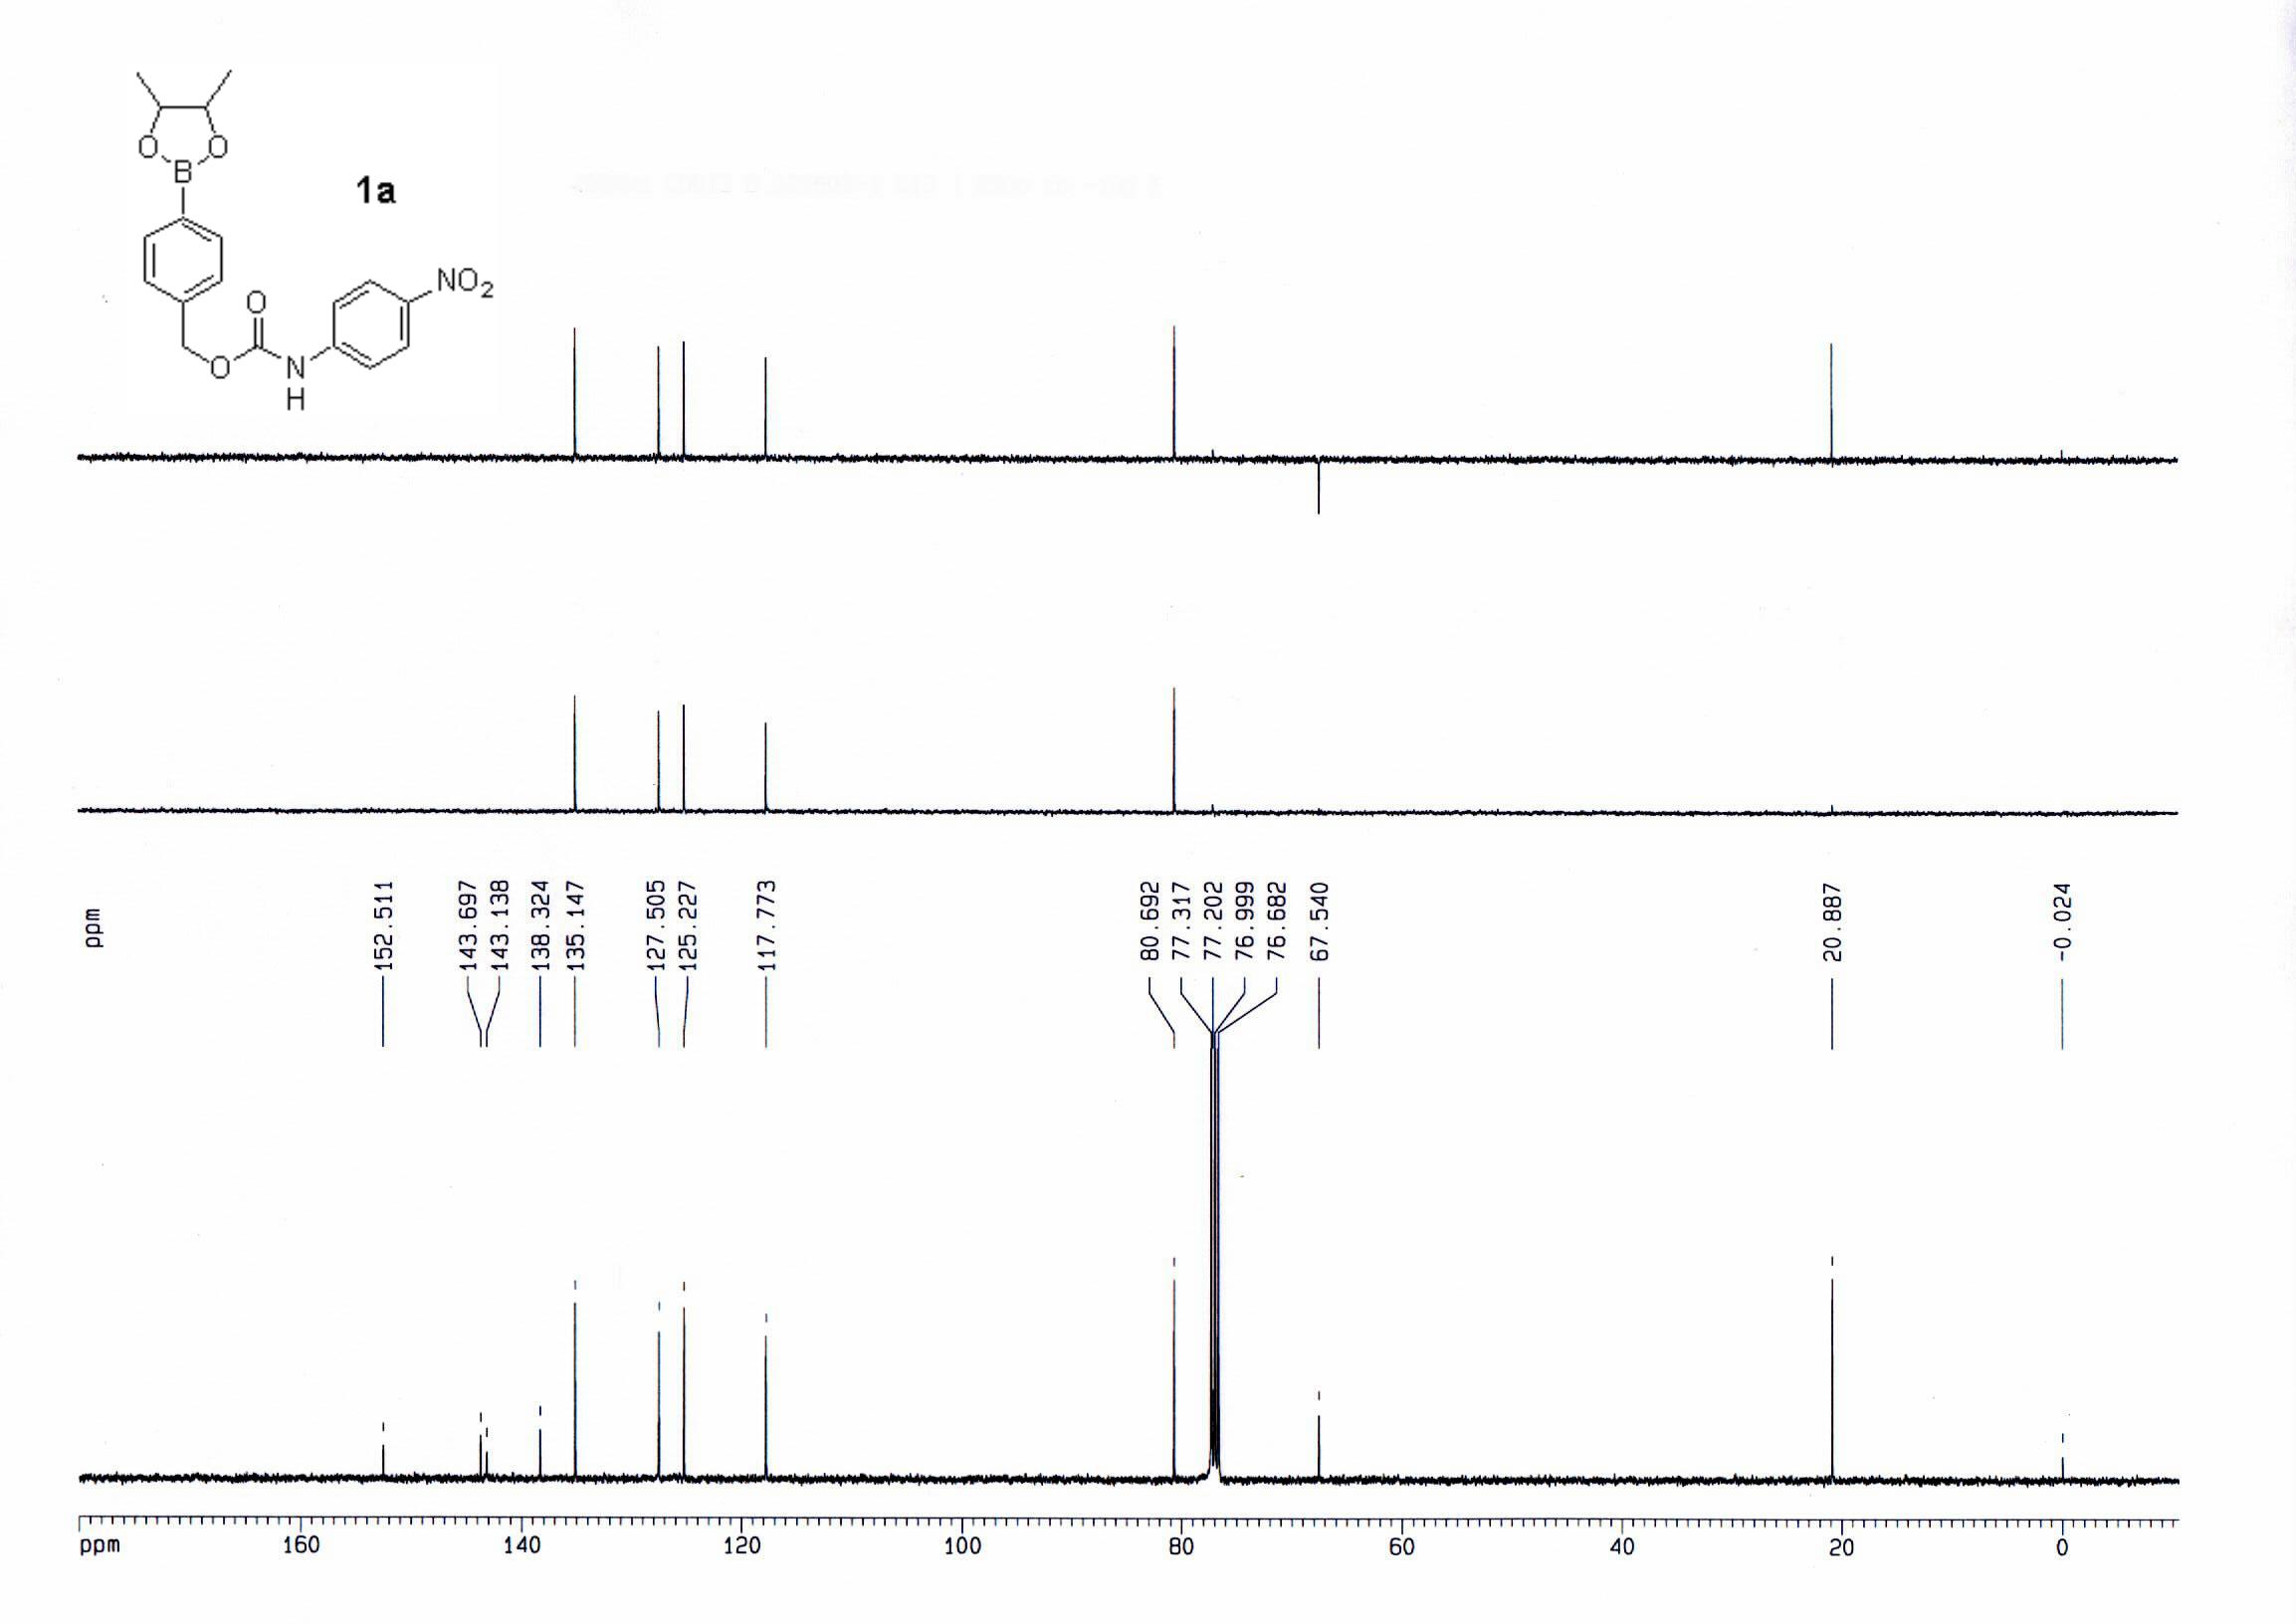


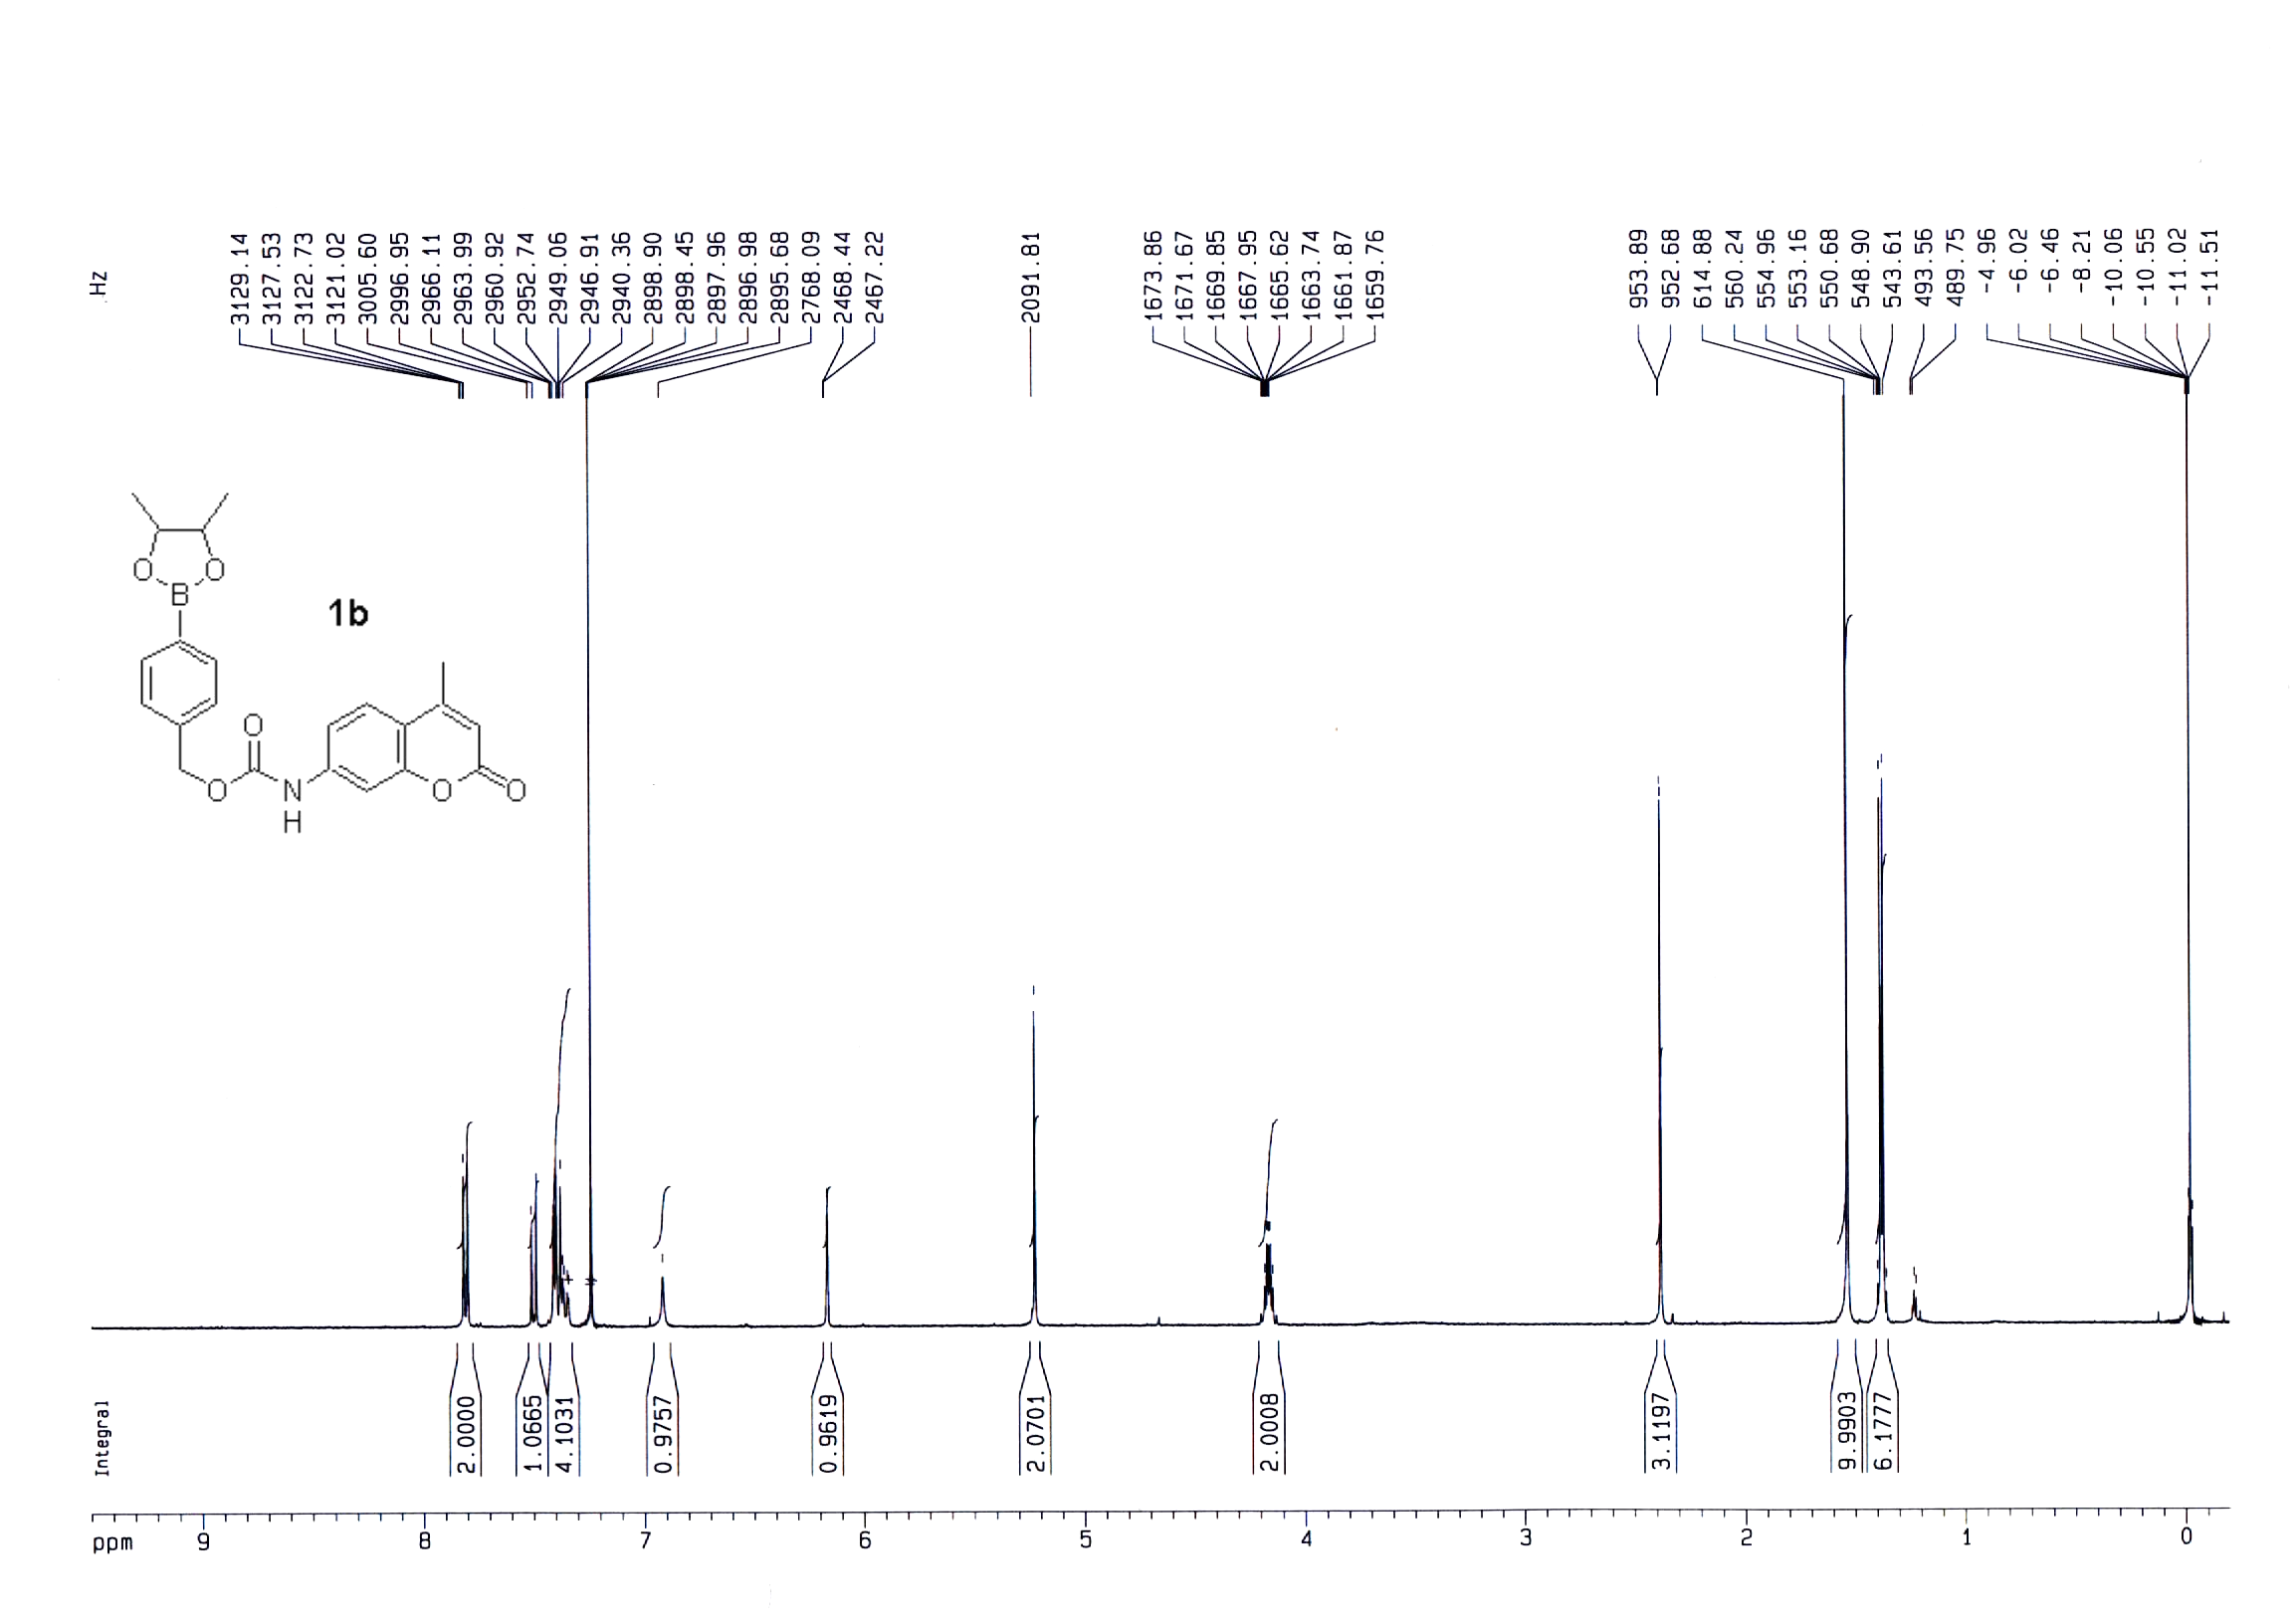


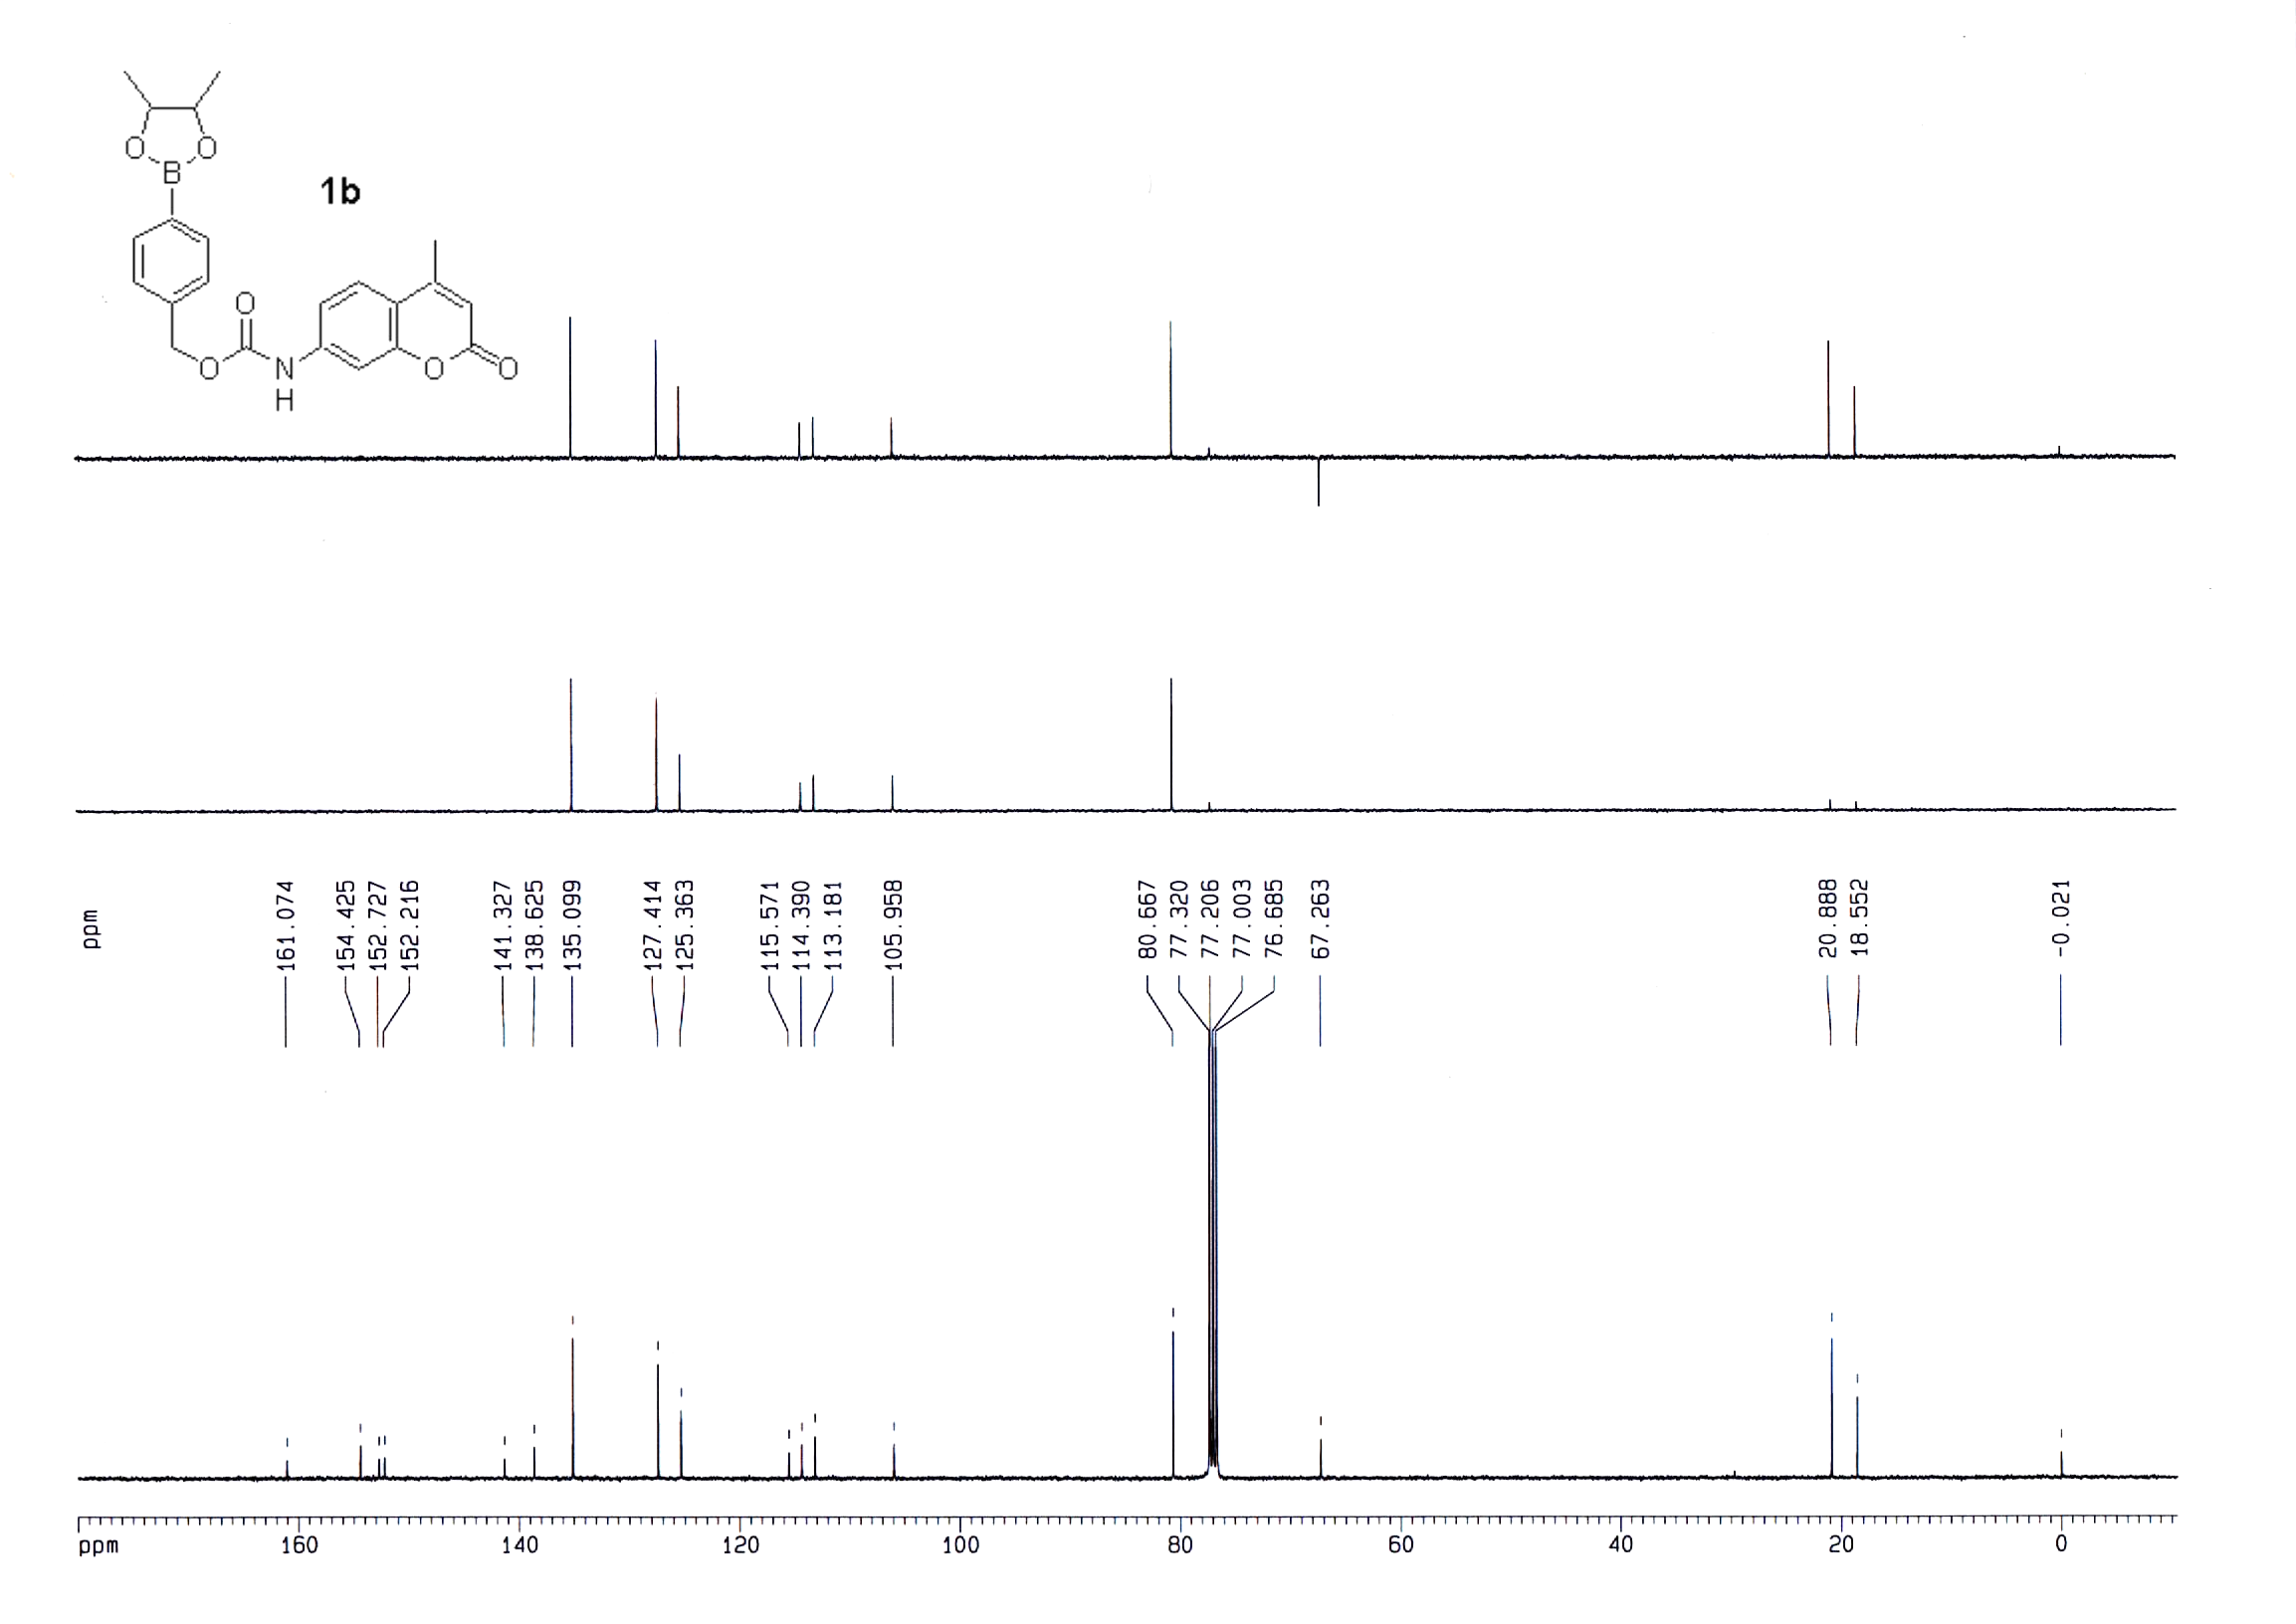


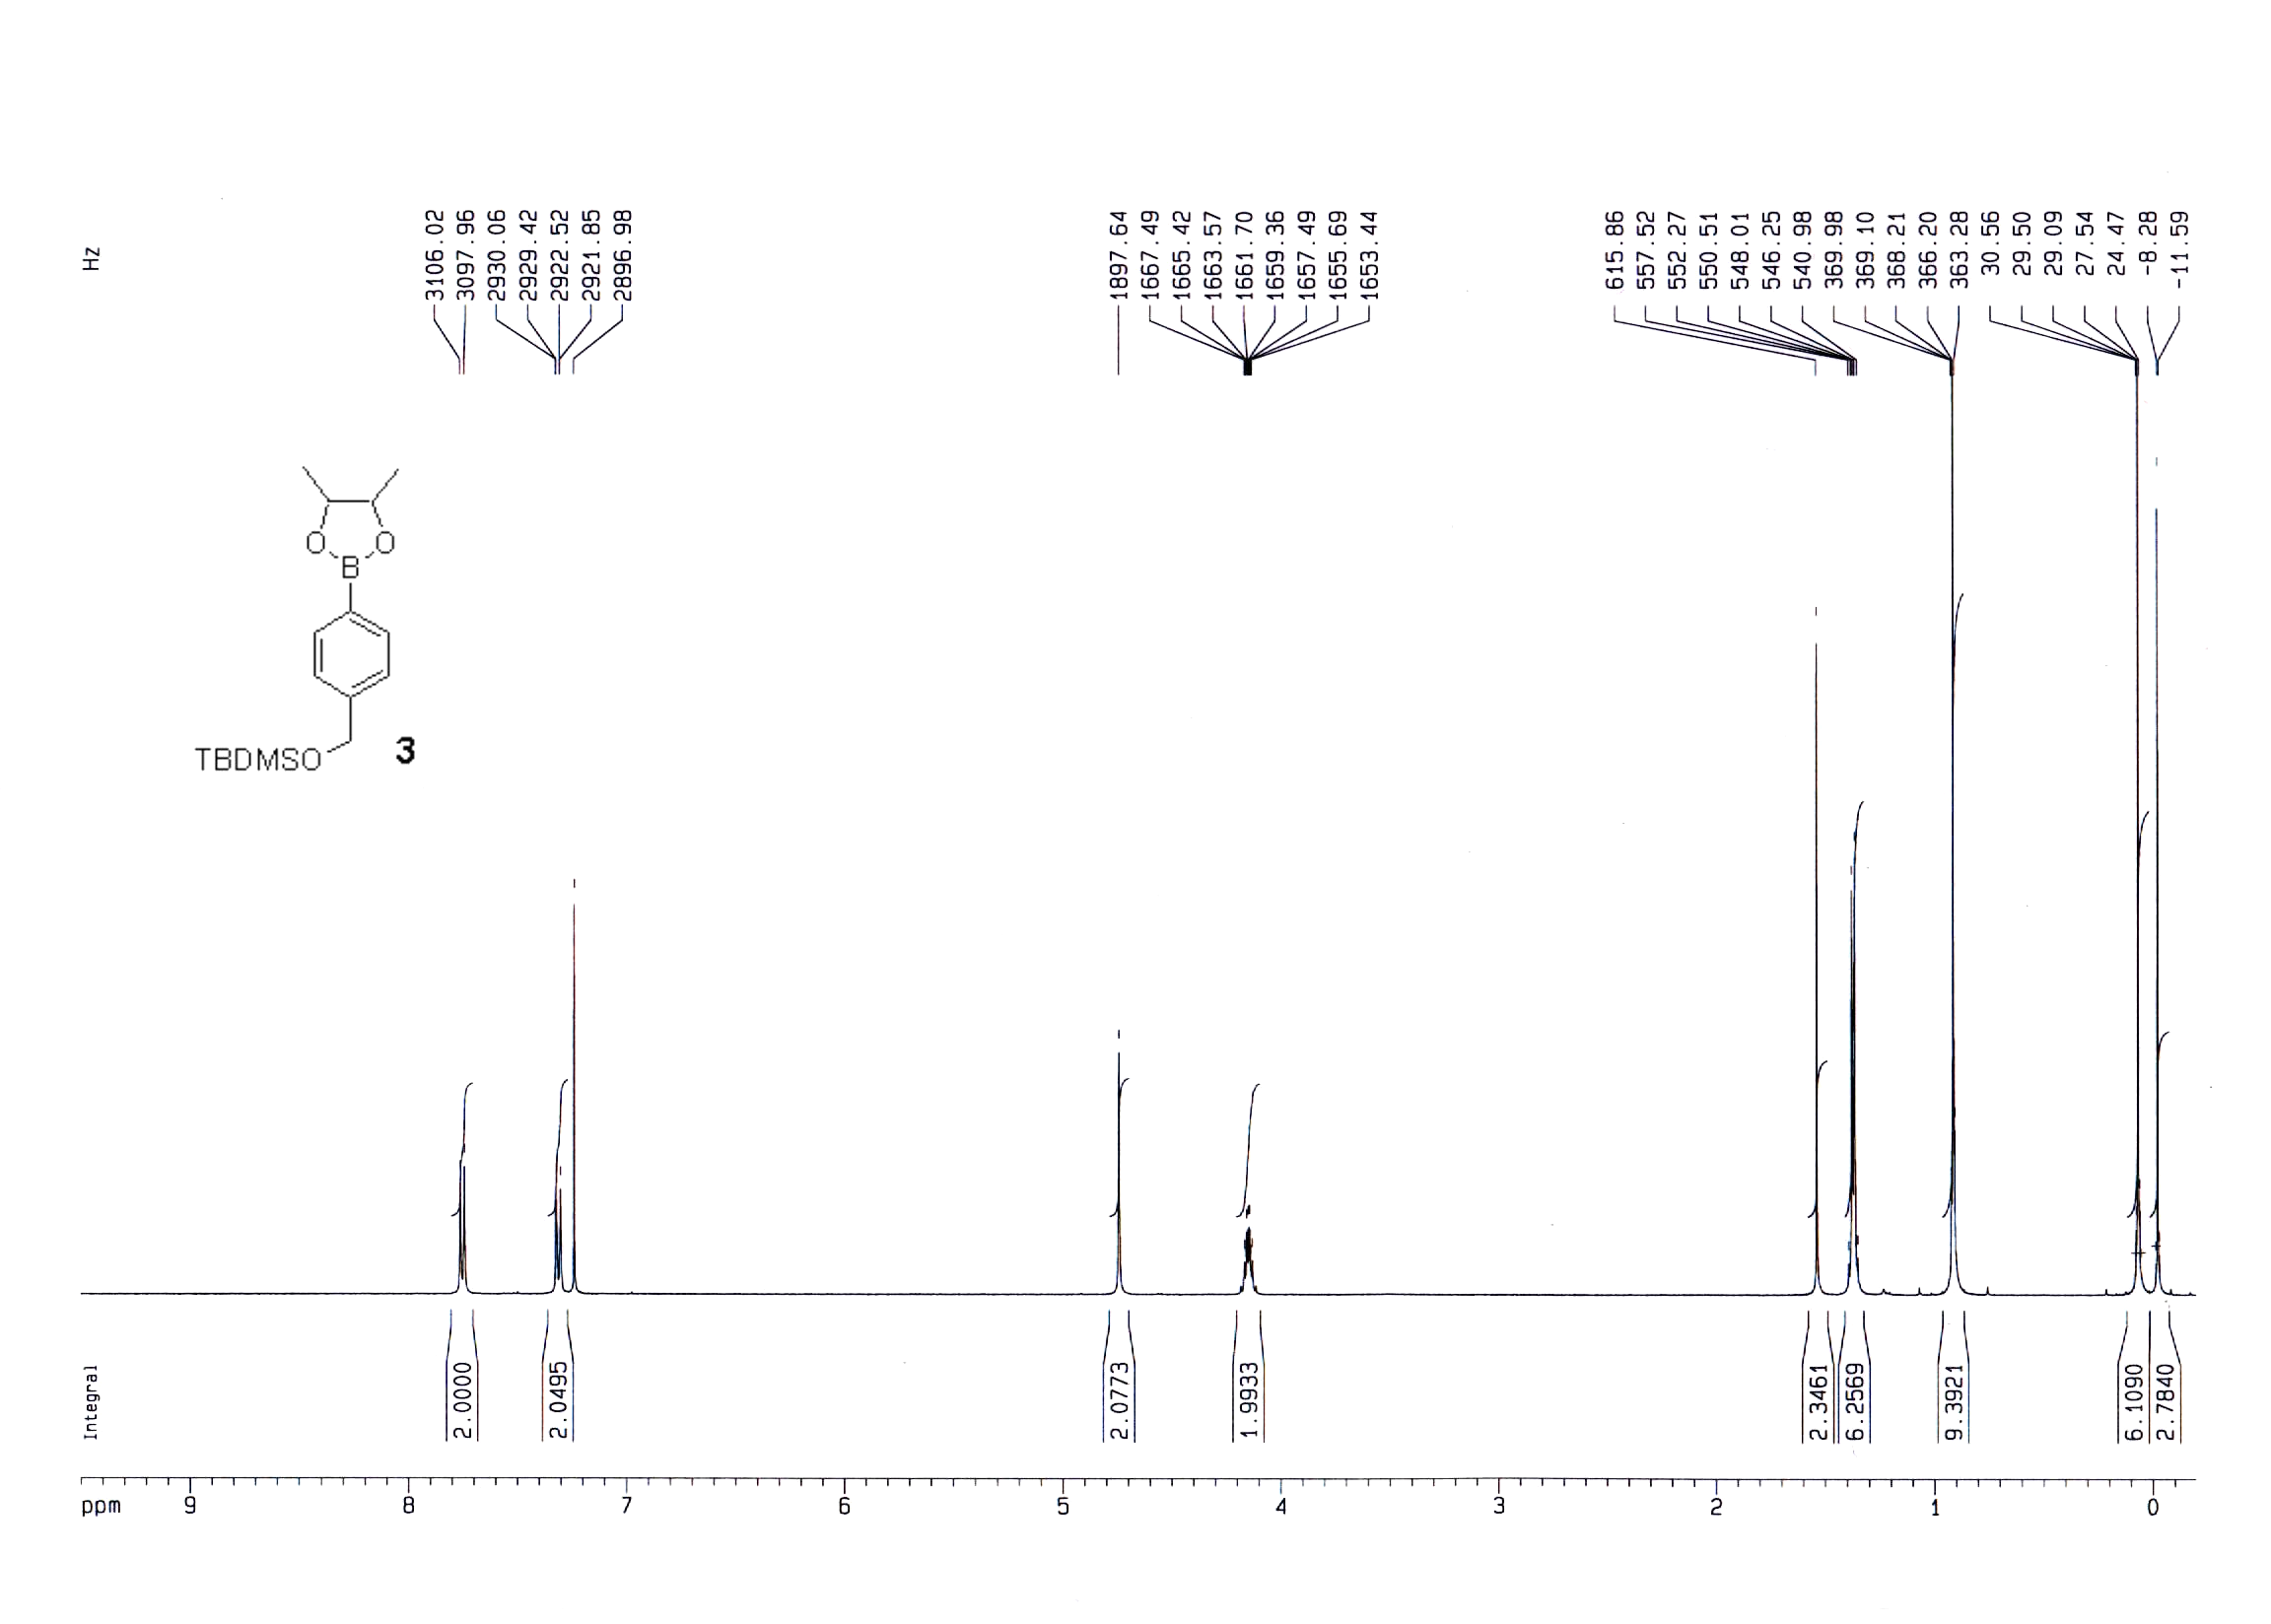


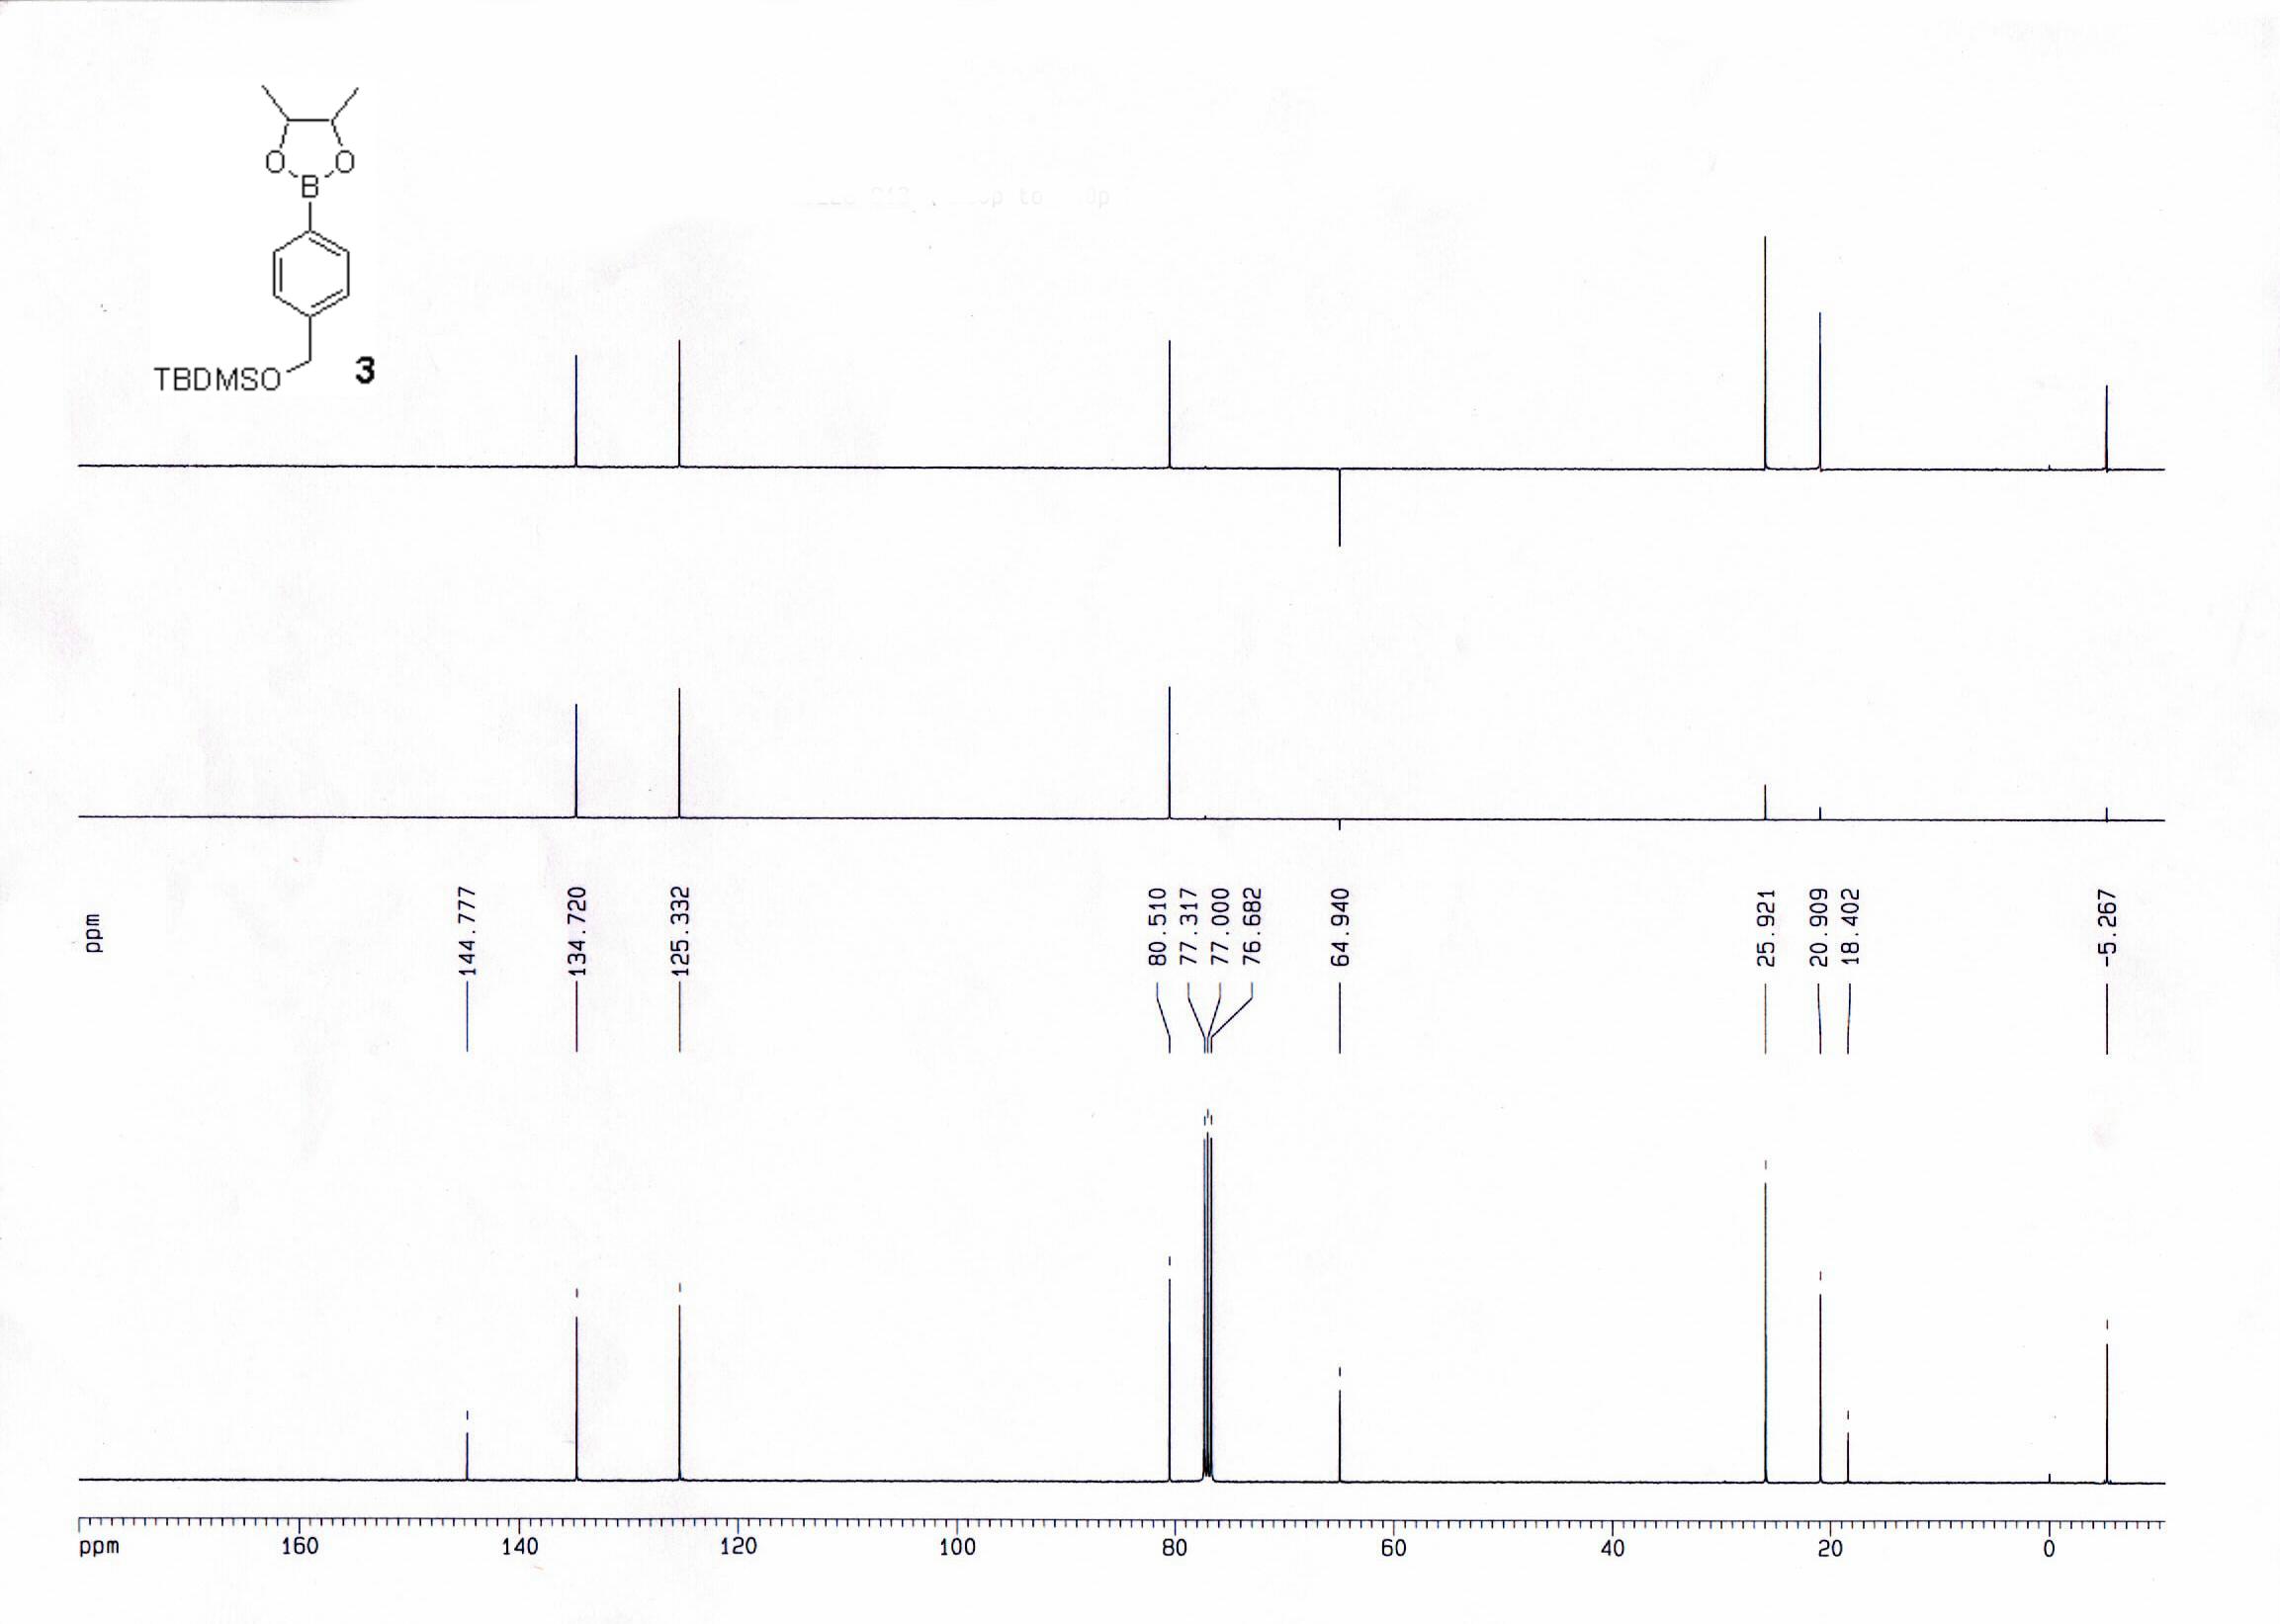


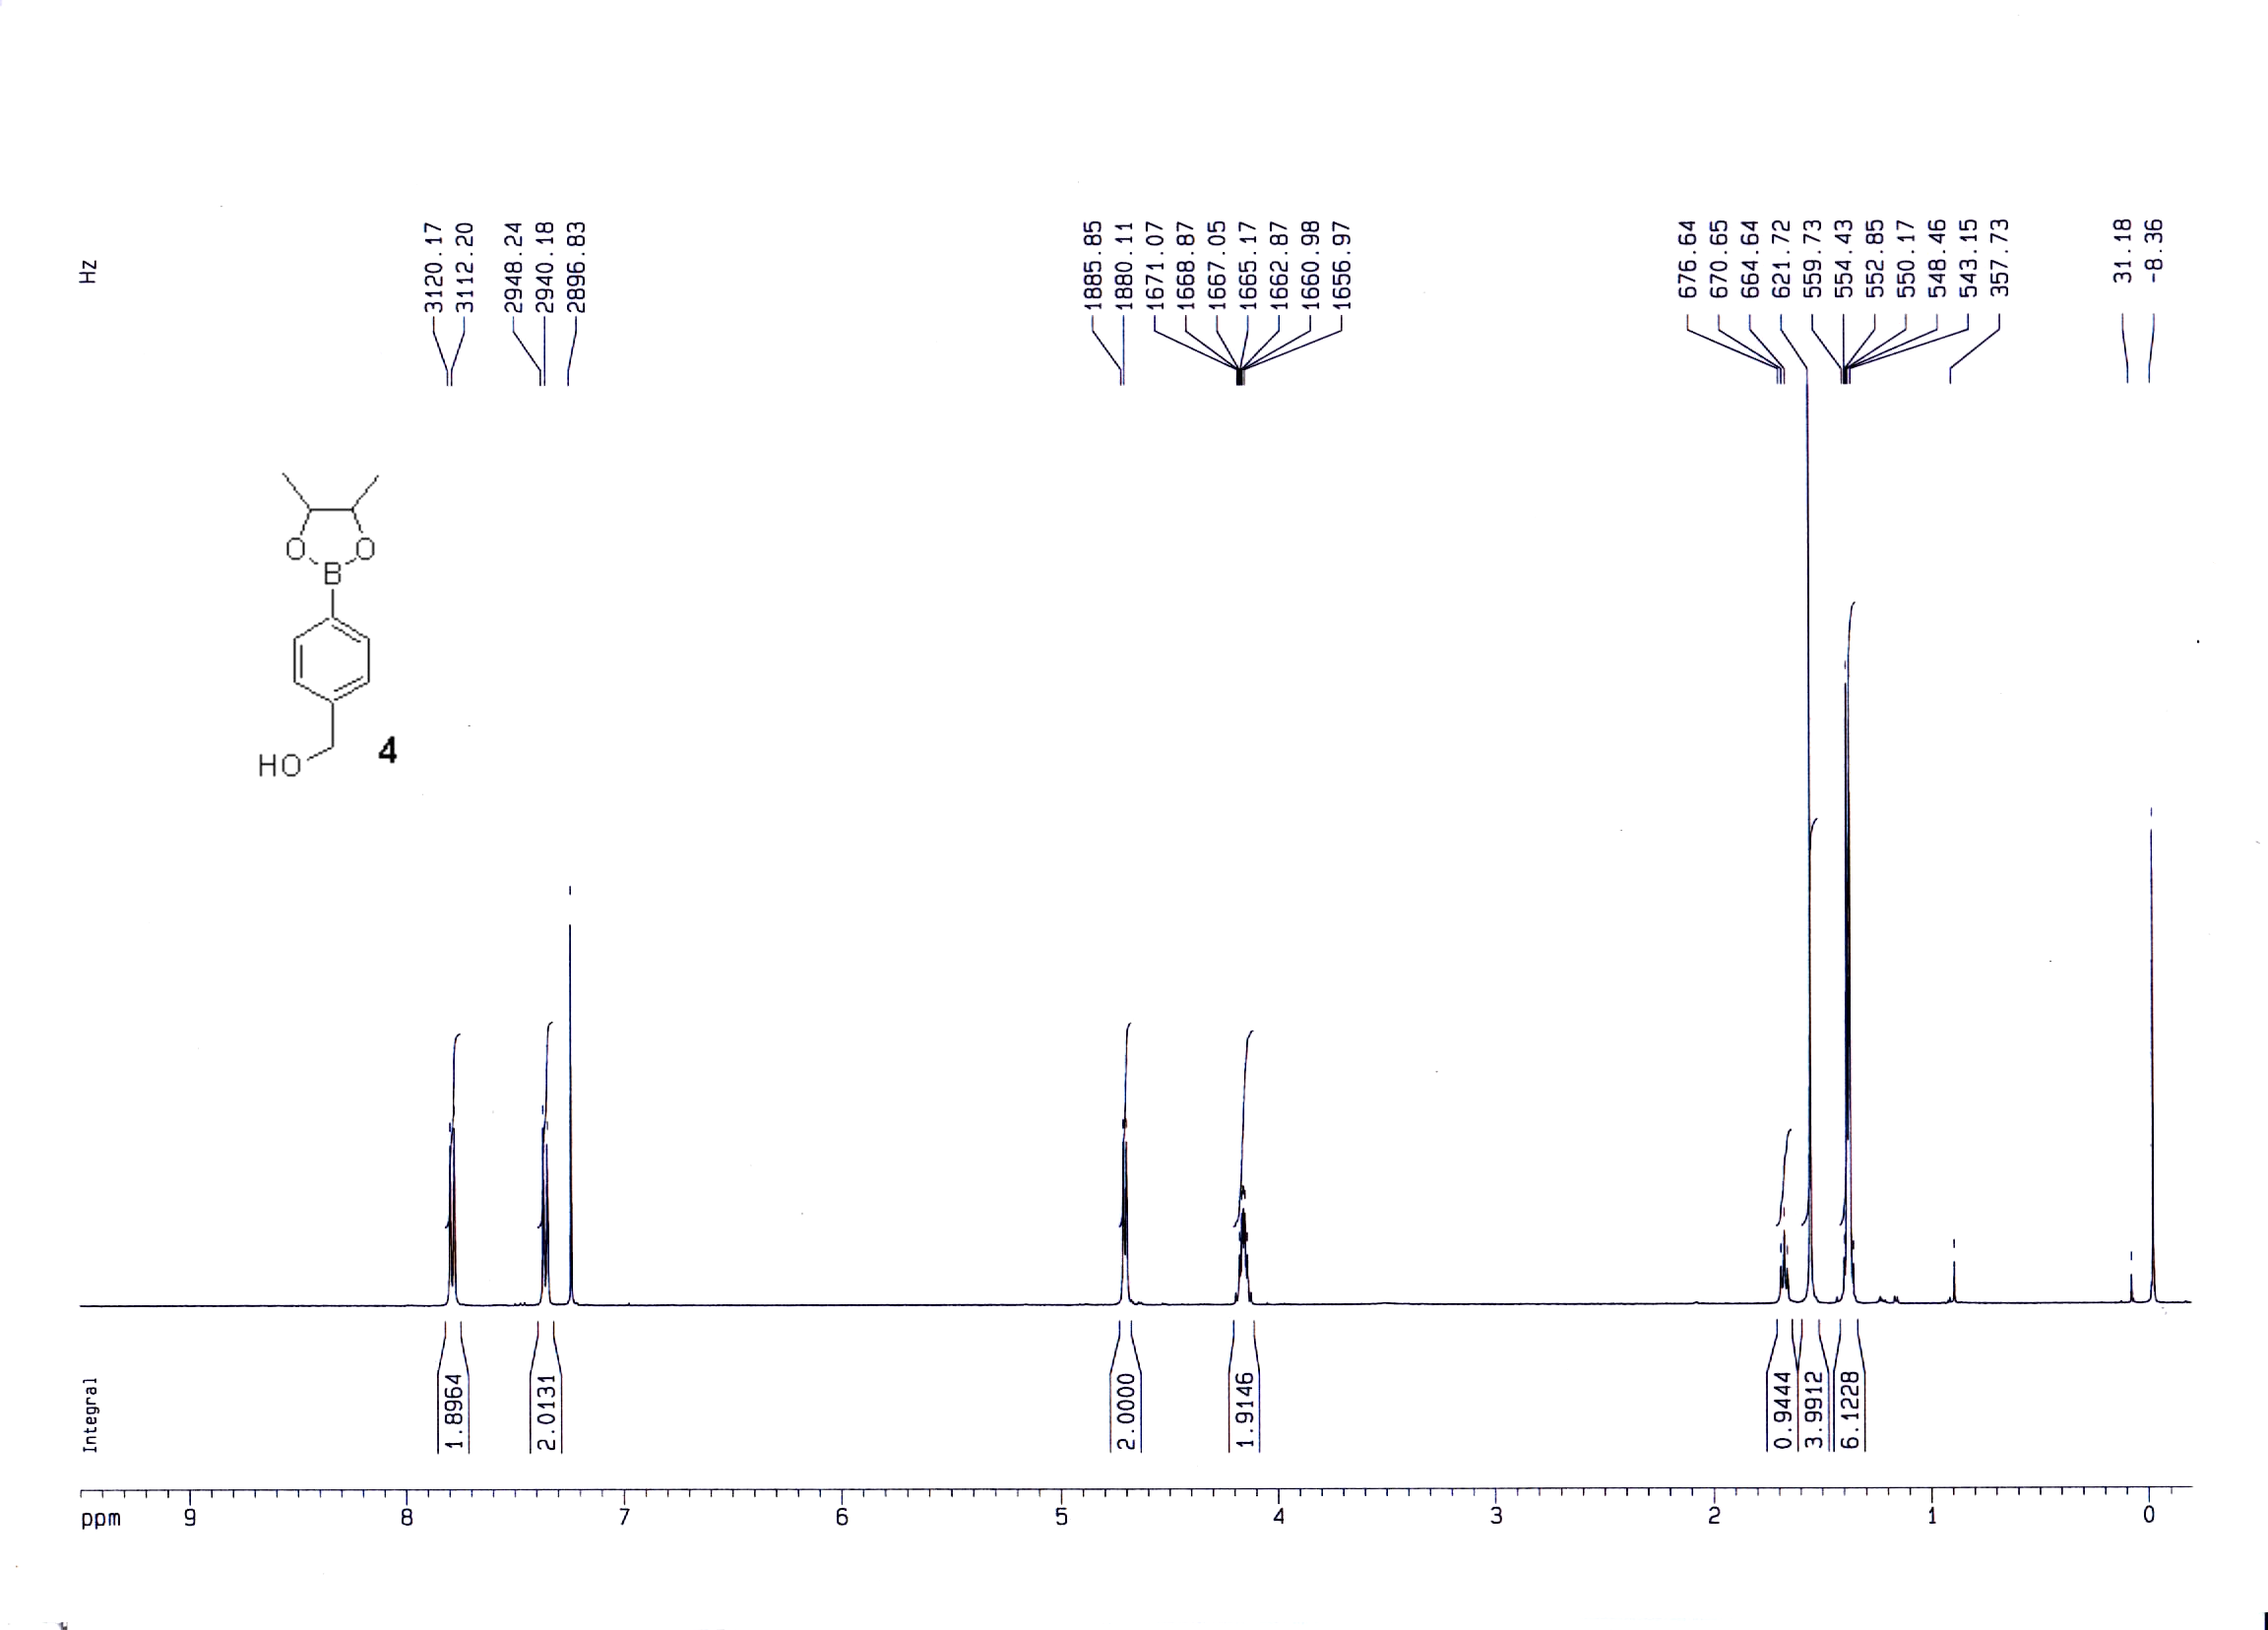


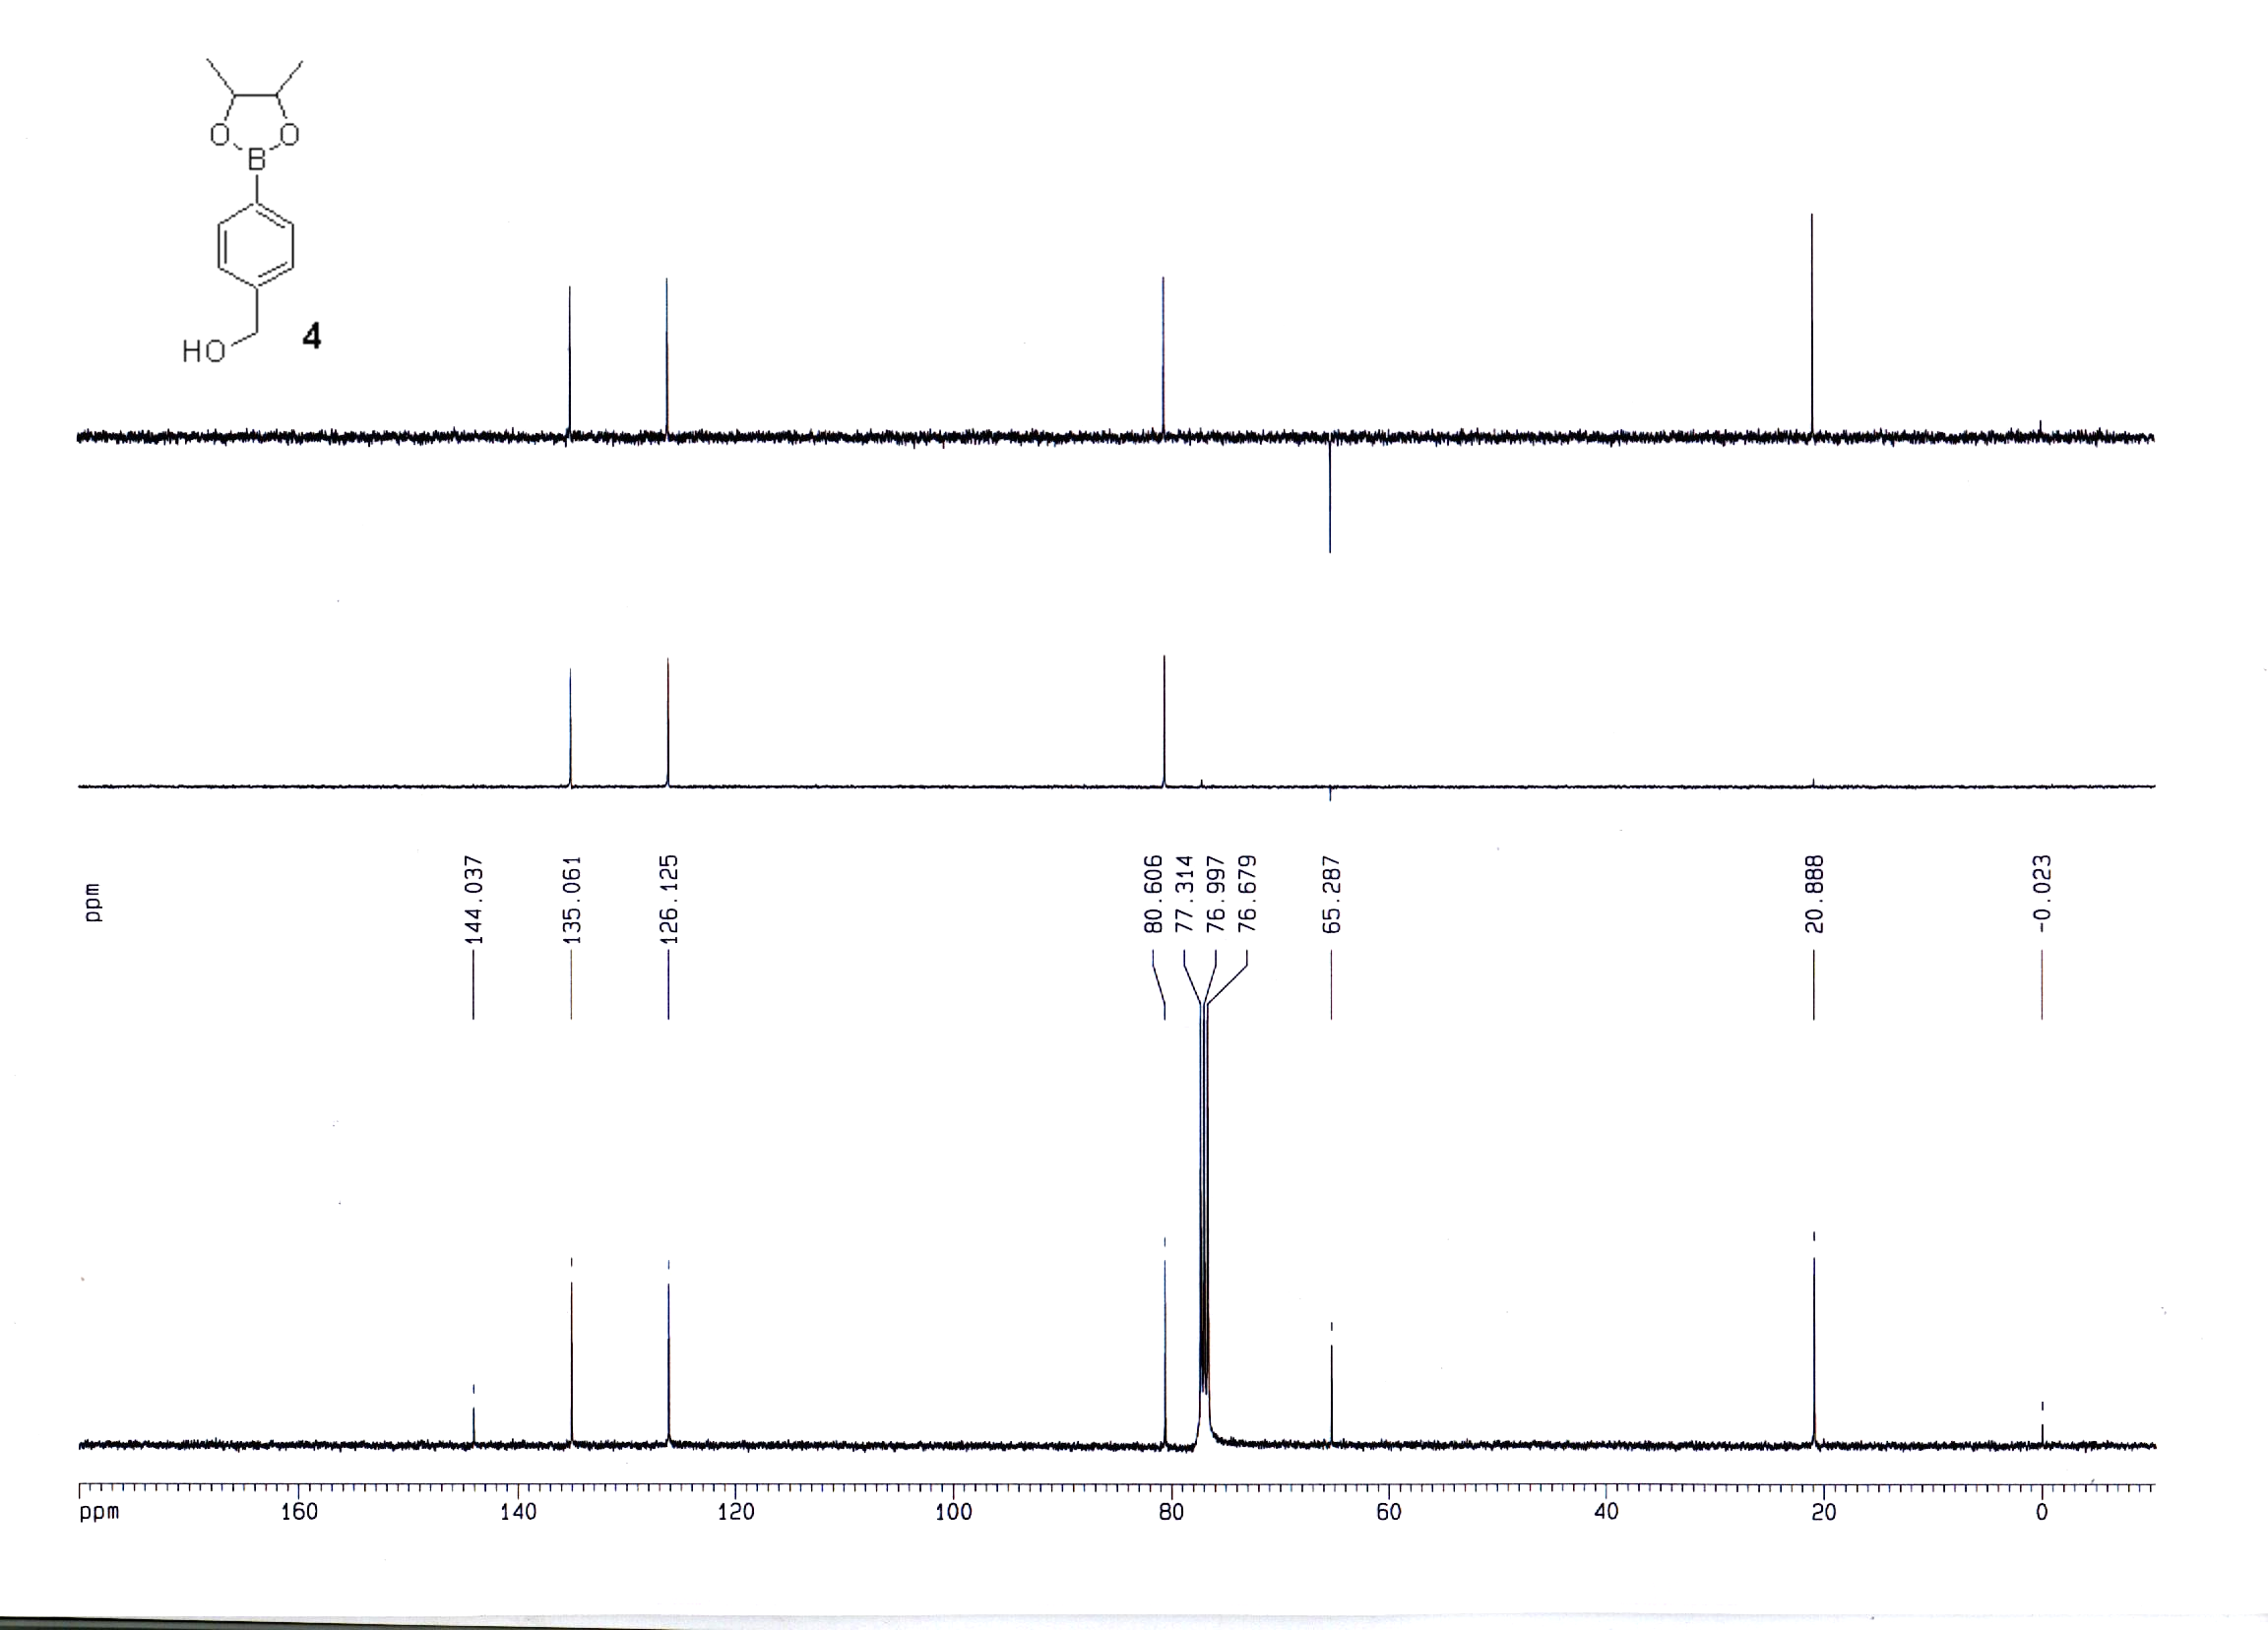


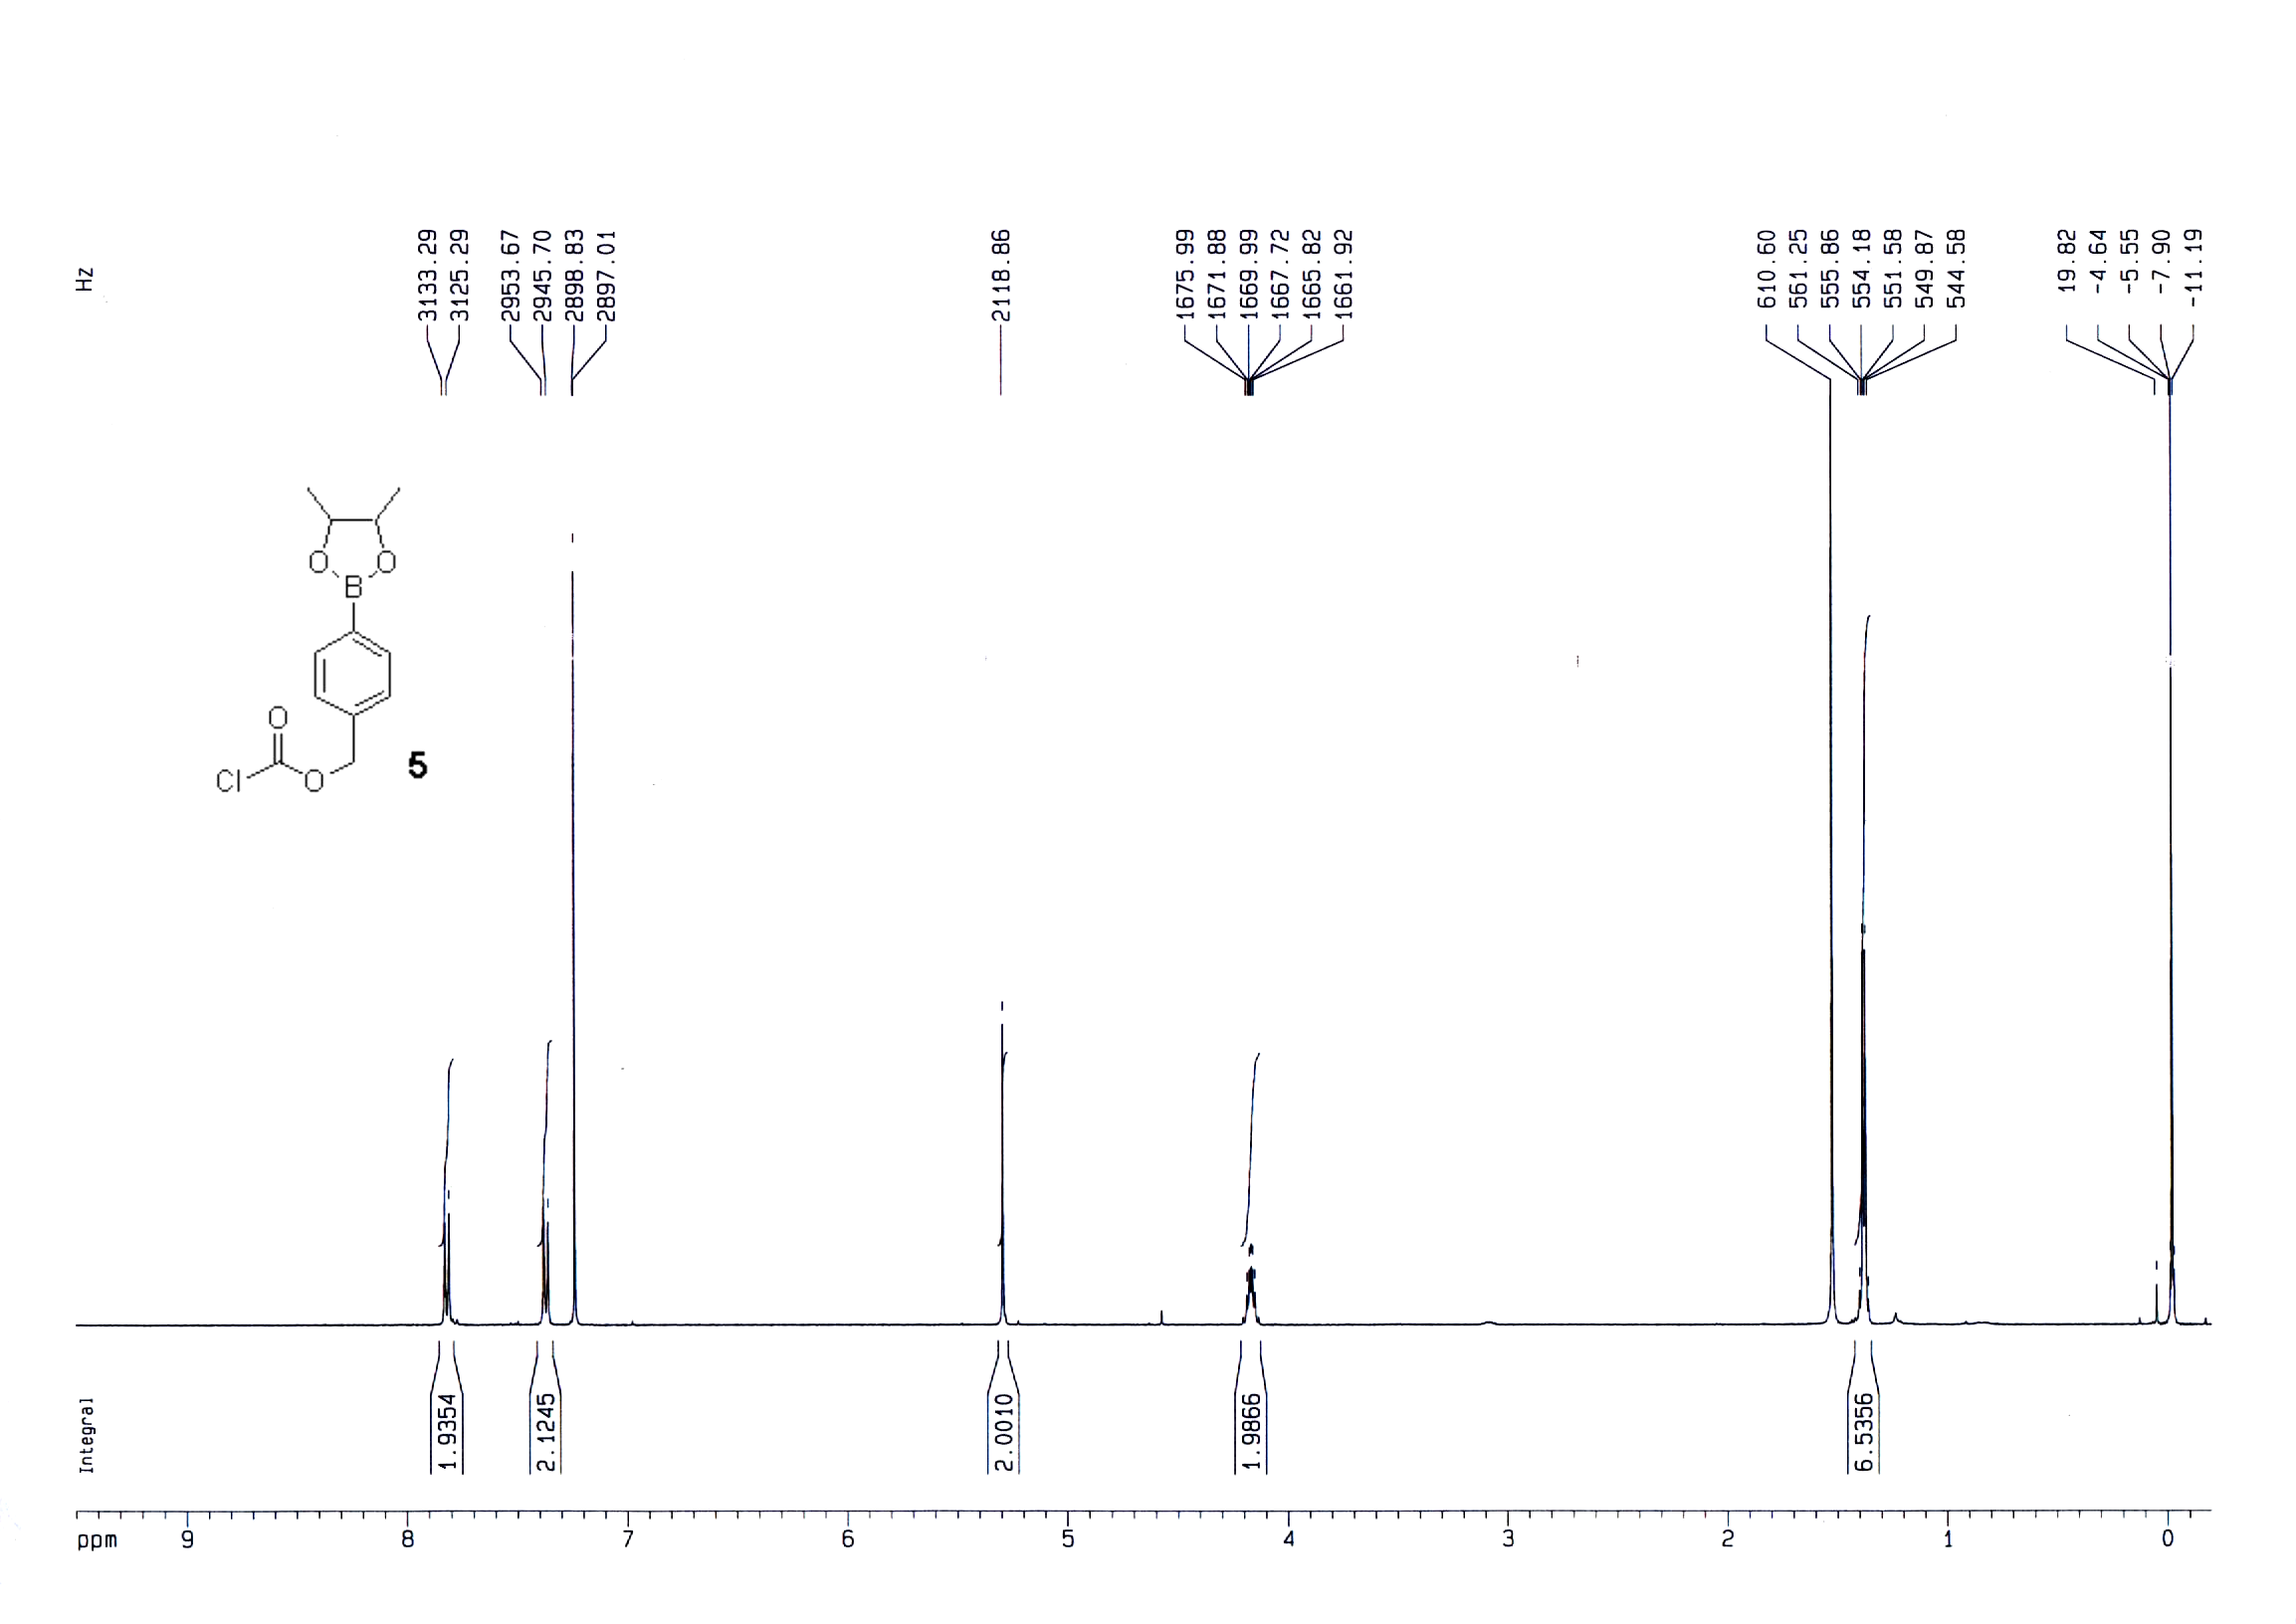


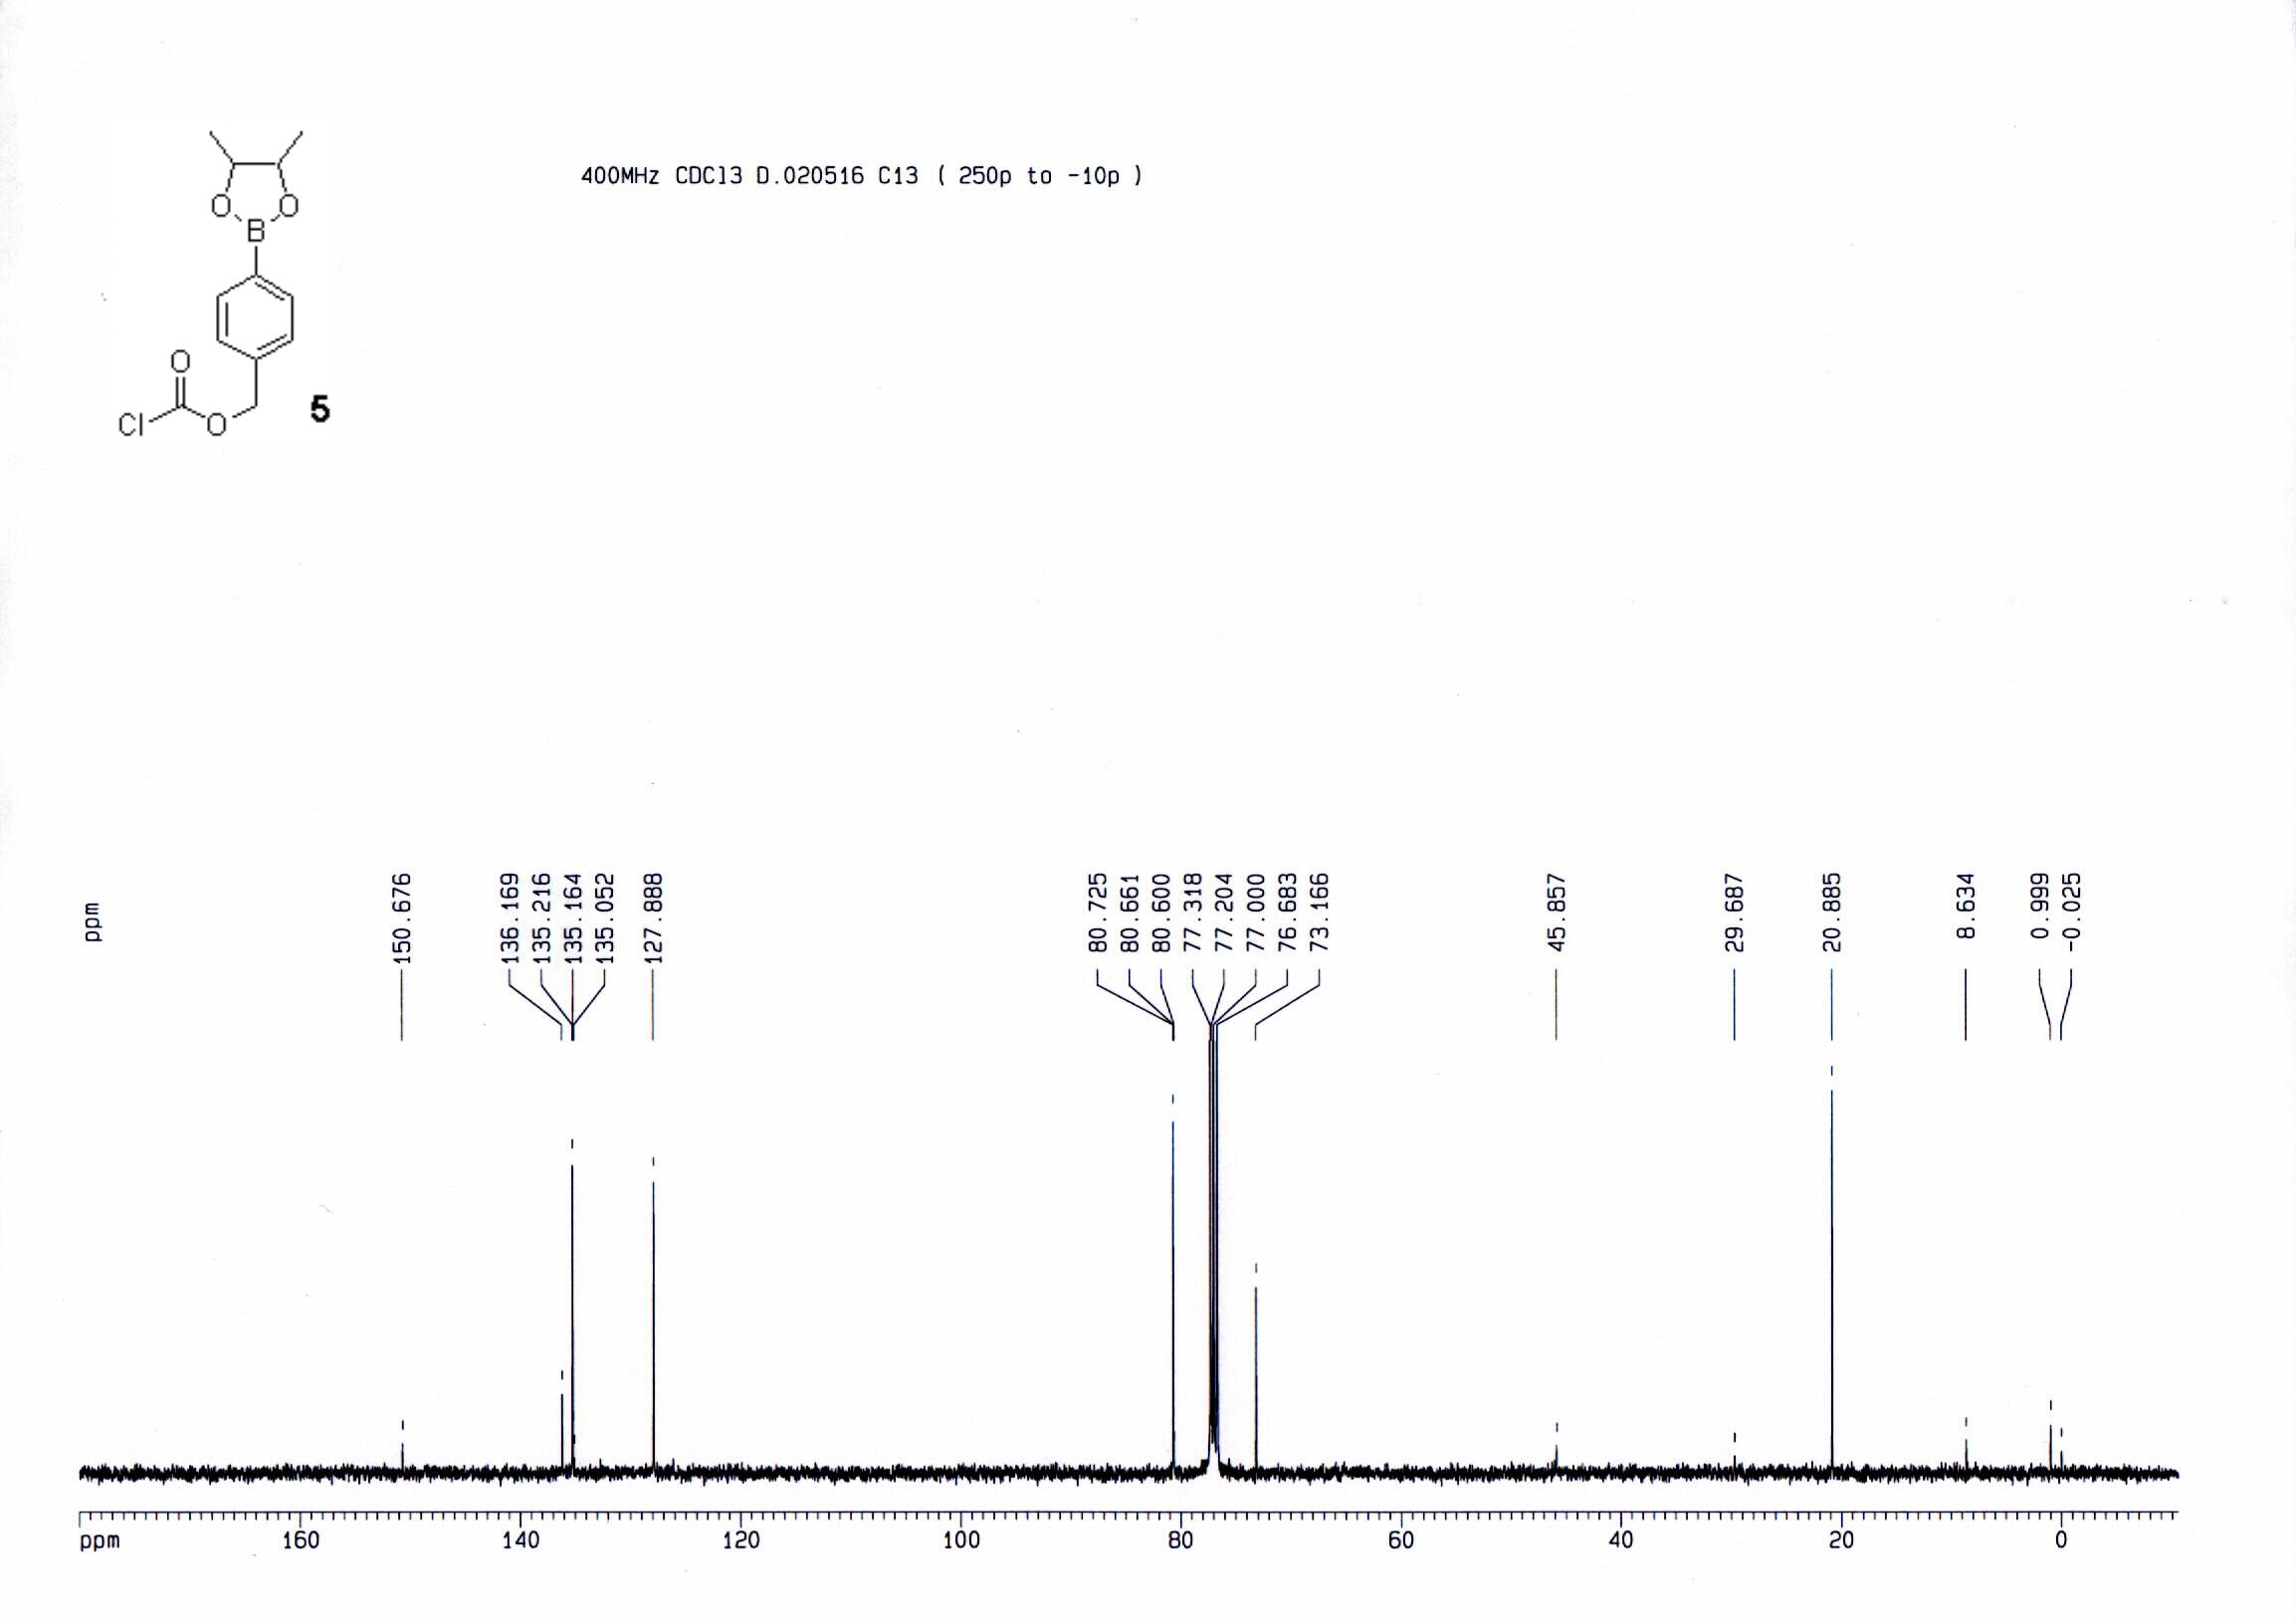

Supplement: b309393j.doc [file b309393j.doc]
